# Supplementary material for: Circulating amino acids and the risk of macrovascular, microvascular and mortality outcomes in individuals with type 2 diabetes: results from the ADVANCE trial
Source: Springer Nature journal article supplement (doi:10.1007/s00125-018-4619-x), 2018-05-04
Supplement: MOESM1 [file 15739238]

**Circulating amino acids and the risk of macrovascular, microvascular, and mortality outcomes in individuals with type 2 diabetes: results from the ADVANCE trial**

**Welsh et al**

**SUPPLEMENTARY DATA**

ESM Table 1 Illustrative comparisons of mean or median concentrations of amino acids measured by comparable method (1), by study.

| Study                                                                                                                                                       | Phenylalanine<br>(mmol/l) | Isoleucine<br>(mmol/l) | Glutamine<br>(mmol/l)  | Leucine<br>(mmol/l)    | Alanine<br>(mmol/l)    | Tyrosine<br>(mmol/l)   | Histidine<br>(mmol/l)  | Valine<br>(mmol/l)     |
|-------------------------------------------------------------------------------------------------------------------------------------------------------------|---------------------------|------------------------|------------------------|------------------------|------------------------|------------------------|------------------------|------------------------|
| ADVANCE: participant with type 2 diabetes case-cohort study.<br>2955 who did not die during follow-up.<br>Mean (SD)                                         | 0.061<br>(0.009)          | 0.063<br>(0.017)       | 0.381<br>(0.109)       | 0.082<br>(0.020)       | 0.372<br>(0.065)       | 0.053<br>(0.011)       | 0.050<br>(0.009)       | 0.176<br>(0.035)       |
| SABRE (2): A community-based cohort of European, South Asian and African-Caribbean origin in London.<br>1279 Europeans without diabetes.<br>Median (IQR)    | 0.092<br>(0.084,0.100)    | 0.057<br>(0.050,0.066) | 0.384<br>(0.257,0.448) | 0.091<br>(0.080,0.110) | 0.326<br>(0.290,0.365) | 0.054<br>(0.048,0.061) | 0.077<br>(0.069,0.088) | 0.179<br>(0.158,0.202) |
| SABRE (2): A community-based cohort of European, South Asian and African-Caribbean origin in London.<br>1007 South Asians without diabetes.<br>Median (IQR) | 0.094<br>(0.086,0.100)    | 0.060<br>(0.052,0.068) | 0.410<br>(0.309,0.471) | 0.093<br>(0.083,0.110) | 0.335<br>(0.301,0.375) | 0.060<br>(0.053,0.067) | 0.078<br>(0.070,0.089) | 0.178<br>(0.156,0.199) |
| FINRISK (3): Finnish general population cohort.<br>7610 with available serum sample.<br>Mean (SD)                                                           | 0.085<br>(0.014)          | 0.058<br>(0.019)       | 0.470<br>(0.070)       | 0.088<br>(0.021)       | 0.430<br>(0.067)       | 0.051<br>(0.013)       | 0.064<br>(0.010)       | 0.210<br>(0.043)       |
| Young Finns Study (4): Cohort study of younger adults aged 34-49.<br>1630 with normal fatty liver score.<br>Mean (SD)                                       | 0.074<br>(0.010)          | 0.051<br>(0.015)       | 0.595<br>(0.068)       | 0.080<br>(0.016)       | 0.399<br>(0.059)       | 0.050<br>(0.010)       | 0.065<br>(0.010)       | 0.199<br>(0.038)       |
| CAMERA Trial (5): Randomised controlled trial of metformin in people with CHD but not diabetes.<br>173 randomised participants<br>Mean (SD)                 | 0.047<br>(0.008)          | 0.043<br>(0.013)       | 0.396<br>(0.064)       | 0.056<br>(0.012)       | 0.250<br>(0.062)       | 0.061<br>(0.012)       | 0.046<br>(0.010)       | 0.152<br>(0.031)       |

ESM Table 2 Baseline characteristics classified by quarters of the phenylalanine distribution

| Characteristics                | Phenylalanine (mmol/L)           |                                          |                                          |                               | p-value<br>for trend |
|--------------------------------|----------------------------------|------------------------------------------|------------------------------------------|-------------------------------|----------------------|
|                                | 1st( $\leq 0.056$ )<br>(N = 885) | 2nd(0.056 to $\leq 0.061$ )<br>(N = 886) | 3rd(0.061 to $\leq 0.066$ )<br>(N = 884) | 4th( $> 0.066$ )<br>(N = 884) |                      |
| Sex                            |                                  |                                          |                                          |                               |                      |
| Male                           | 545/ 885 (61.6%)                 | 527/ 886 (59.5%)                         | 525/ 884 (59.4%)                         | 553/ 884 (62.6%)              | 0.6999               |
| Female                         | 340/ 885 (38.4%)                 | 359/ 886 (40.5%)                         | 359/ 884 (40.6%)                         | 331/ 884 (37.4%)              |                      |
| Current smokers                |                                  |                                          |                                          |                               |                      |
| No                             | 747/ 885 (84.4%)                 | 763/ 886 (86.1%)                         | 745/ 884 (84.3%)                         | 757/ 884 (85.6%)              | 0.7314               |
| Yes                            | 138/ 885 (15.6%)                 | 123/ 886 (13.9%)                         | 139/ 884 (15.7%)                         | 127/ 884 (14.4%)              |                      |
| History of macrovascular event |                                  |                                          |                                          |                               |                      |
| No                             | 626/ 885 (70.7%)                 | 580/ 886 (65.5%)                         | 538/ 884 (60.9%)                         | 556/ 884 (62.9%)              | <0.001               |
| Yes                            | 259/ 885 (29.3%)                 | 306/ 886 (34.5%)                         | 346/ 884 (39.1%)                         | 328/ 884 (37.1%)              |                      |
| Age (years)                    |                                  |                                          |                                          |                               |                      |
| N                              | 885                              | 886                                      | 884                                      | 884                           | <0.001               |
| Mean (SD)                      | 66.0 (6.4)                       | 66.4 (6.4)                               | 66.9 (6.5)                               | 68.0 (6.8)                    |                      |
| Median (IRQ)                   | 66.0 (61.0, 71.0)                | 67.0 (61.0, 71.0)                        | 67.0 (62.0, 71.0)                        | 68.0 (63.0, 73.0)             |                      |
| Duration of diabetes (years)   |                                  |                                          |                                          |                               |                      |
| N                              | 885                              | 885                                      | 884                                      | 884                           | 0.001                |
| Mean (SD)                      | 8.5 (6.6)                        | 7.8 (6.3)                                | 7.8 (6.3)                                | 7.5 (6.6)                     |                      |
| Median (IRQ)                   | 7.0 (3.0, 12.0)                  | 6.0 (3.0, 11.0)                          | 6.0 (3.0, 11.0)                          | 6.0 (2.0, 11.0)               |                      |
| BMI (Kg/m <sup>2</sup> )       |                                  |                                          |                                          |                               |                      |
| N                              | 885                              | 885                                      | 883                                      | 884                           | <0.001               |
| Mean (SD)                      | 28.8 (4.5)                       | 29.9 (5.1)                               | 30.6 (5.6)                               | 30.8 (5.5)                    |                      |

| Characteristics                                | Phenylalanine (mmol/L)    |                                    |                                    |                          | p-value<br>for trend |
|------------------------------------------------|---------------------------|------------------------------------|------------------------------------|--------------------------|----------------------|
|                                                | 1st(<=0.056)<br>(N = 885) | 2nd(0.056 to <=0.061)<br>(N = 886) | 3rd(0.061 to <=0.066)<br>(N = 884) | 4th(>0.066)<br>(N = 884) |                      |
| Median (IRQ)                                   | 28.4 (25.7, 31.3)         | 29.1 (26.5, 32.5)                  | 29.7 (26.7, 33.5)                  | 30.1 (27.0, 33.6)        |                      |
| History of heart failure                       |                           |                                    |                                    |                          |                      |
| No                                             | 859/ 885 (97.1%)          | 855/ 886 (96.5%)                   | 839/ 884 (94.9%)                   | 824/ 884 (93.2%)         | <0.001               |
| Yes                                            | 26/ 885 (2.9%)            | 31/ 886 (3.5%)                     | 45/ 884 (5.1%)                     | 60/ 884 (6.8%)           |                      |
| Participation in moderate or vigorous activity |                           |                                    |                                    |                          |                      |
| No                                             | 439/ 885 (49.6%)          | 431/ 886 (48.6%)                   | 453/ 884 (51.2%)                   | 499/ 884 (56.4%)         | 0.0021               |
| Yes                                            | 446/ 885 (50.4%)          | 455/ 886 (51.4%)                   | 431/ 884 (48.8%)                   | 385/ 884 (43.6%)         |                      |
| SBP (mmHg)                                     |                           |                                    |                                    |                          |                      |
| N                                              | 885                       | 886                                | 883                                | 884                      | 0.4541               |
| Mean (SD)                                      | 146.1 (21.1)              | 147.6 (21.9)                       | 148.2 (21.8)                       | 146.7 (21.0)             |                      |
| Median (IRQ)                                   | 144.0 (131.5, 158.0)      | 145.0 (132.5, 159.5)               | 146.5 (133.5, 160.5)               | 145.5 (132.5, 159.0)     |                      |
| DBP (mmHg)                                     |                           |                                    |                                    |                          |                      |
| N                                              | 885                       | 886                                | 883                                | 884                      | 0.5481               |
| Mean (SD)                                      | 81.3 (10.9)               | 81.9 (10.7)                        | 82.4 (11.0)                        | 80.8 (10.7)              |                      |
| Median (IRQ)                                   | 80.5 (73.5, 88.5)         | 81.5 (74.5, 89.0)                  | 82.0 (75.0, 89.0)                  | 80.5 (73.5, 87.5)        |                      |
| Total chol (mmol/l)                            |                           |                                    |                                    |                          |                      |
| N                                              | 885                       | 884                                | 884                                | 884                      | 0.1233               |
| Mean (SD)                                      | 5.1 (1.1)                 | 5.2 (1.2)                          | 5.2 (1.3)                          | 5.1 (1.1)                |                      |
| Median (IRQ)                                   | 5.0 (4.3, 5.9)            | 5.1 (4.3, 5.9)                     | 5.0 (4.4, 5.9)                     | 4.9 (4.3, 5.8)           |                      |
| HDL Chol (mmol/l)                              |                           |                                    |                                    |                          |                      |
| N                                              | 884                       | 883                                | 884                                | 883                      |                      |

| Characteristics                            | Phenylalanine (mmol/L)    |                                    |                                    |                          | p-value for trend |
|--------------------------------------------|---------------------------|------------------------------------|------------------------------------|--------------------------|-------------------|
|                                            | 1st(<=0.056)<br>(N = 885) | 2nd(0.056 to <=0.061)<br>(N = 886) | 3rd(0.061 to <=0.066)<br>(N = 884) | 4th(>0.066)<br>(N = 884) |                   |
| Mean (SD)                                  | 1.3 (0.3)                 | 1.2 (0.3)                          | 1.2 (0.3)                          | 1.2 (0.3)                | <0.001            |
| Median (IRQ)                               | 1.2 (1.0, 1.5)            | 1.2 (1.0, 1.4)                     | 1.2 (1.0, 1.4)                     | 1.2 (1.0, 1.4)           |                   |
| Triacylglycerol (mmol/l)                   |                           |                                    |                                    |                          |                   |
| N                                          | 885                       | 884                                | 882                                | 883                      |                   |
| Mean (SD)                                  | 1.8 (1.1)                 | 2.0 (1.3)                          | 2.0 (1.1)                          | 2.0 (1.3)                | 0.0017            |
| Median (IRQ)                               | 1.6 (1.2, 2.2)            | 1.7 (1.2, 2.3)                     | 1.8 (1.3, 2.4)                     | 1.7 (1.3, 2.4)           |                   |
| HbA1c                                      |                           |                                    |                                    |                          |                   |
| N                                          | 882                       | 881                                | 881                                | 879                      |                   |
| Mean % (SD) [mmol/mol]                     | 7.3 (1.3) [52]            | 7.4 (1.4) [57]                     | 7.5 (1.5) [59]                     | 7.4 (1.5) [57]           | 0.1989            |
| Urinary albumin:creatinine ratio (mg/mmol) |                           |                                    |                                    |                          |                   |
| N                                          | 823                       | 838                                | 845                                | 819                      |                   |
| Median (IRQ)                               | 1.4 (0.7, 3.6)            | 2 (0.8, 5.3)                       | 2 (0.8, 5.3)                       | 2.2 (0.9, 6.5)           | <0.001            |
| Glucose (mmol/l)                           |                           |                                    |                                    |                          |                   |
| N                                          | 885                       | 884                                | 884                                | 884                      |                   |
| Mean (SD)                                  | 8.5 (2.6)                 | 8.5 (2.6)                          | 8.6 (2.8)                          | 8.3 (2.8)                | 0.1697            |
| Median (IRQ)                               | 8.1 (6.8, 9.7)            | 8.0 (6.6, 9.8)                     | 8.0 (6.6, 9.9)                     | 7.7 (6.4, 9.6)           |                   |
| eGFR (mL/min/1.73 m <sup>2</sup> )         |                           |                                    |                                    |                          |                   |
| N                                          | 883                       | 883                                | 878                                | 878                      |                   |
| Mean (SD)                                  | 75.4 (14.9)               | 73.2 (16.5)                        | 70.8 (17.1)                        | 68.0 (17.4)              | <0.001            |
| Median (IRQ)                               | 75.7 (64.9, 87.5)         | 73.8 (60.6, 87.3)                  | 70.8 (59.2, 83.9)                  | 67.4 (56.7, 81.4)        |                   |

| Characteristics   | Phenylalanine (mmol/L)    |                                    |                                    |                          | p-value<br>for trend |
|-------------------|---------------------------|------------------------------------|------------------------------------|--------------------------|----------------------|
|                   | 1st(<=0.056)<br>(N = 885) | 2nd(0.056 to <=0.061)<br>(N = 886) | 3rd(0.061 to <=0.066)<br>(N = 884) | 4th(>0.066)<br>(N = 884) |                      |
| CRP (nmol/l)      |                           |                                    |                                    |                          |                      |
| N                 | 871                       | 856                                | 861                                | 867                      |                      |
| Mean (SD)         | 21.9 (31.4)               | 29.5 (49.5)                        | 36.2 (70.5)                        | 51.4 (93.3)              | <0.001               |
| Median (IRQ)      | 12.4 (6.7, 24.8)          | 15.2 (8.6, 37.1)                   | 20.0 (9.5, 41.9)                   | 24.8 (10.5, 51.4)        |                      |
| hs-cTnT (ng/l)    |                           |                                    |                                    |                          |                      |
| N                 | 870                       | 856                                | 860                                | 866                      |                      |
| Mean (SD)         | 7.8 (12.9)                | 7.5 (8.7)                          | 8.9 (17.8)                         | 11.4 (32.0)              | <0.001               |
| Median (IRQ)      | 4.0 (1.5, 9.0)            | 5.0 (1.5, 10.0)                    | 6.0 (1.5, 11.0)                    | 6.0 (1.5, 13.0)          |                      |
| NT-proBNP (pg/mL) |                           |                                    |                                    |                          |                      |
| N                 | 870                       | 856                                | 860                                | 866                      |                      |
| Mean (SD)         | 177.4 (556.8)             | 206.3 (418.9)                      | 259.8 (557.4)                      | 366.4 (1487.4)           | <0.001               |
| Median (IRQ)      | 67.0 (29.0, 159.0)        | 83.0 (31.0, 202.5)                 | 97.0 (39.5, 247.5)                 | 113.0 (40.0, 281.0)      |                      |

Values are n (%), mean (standard deviation), or median (interquartile range)

ESM Table 3 Baseline characteristics classified by quarters of the isoleucine distribution

| Characteristics                | Isoleucine (mmol/L)              |                                          |                                          |                               | p-value<br>for trend |
|--------------------------------|----------------------------------|------------------------------------------|------------------------------------------|-------------------------------|----------------------|
|                                | 1st( $\leq 0.051$ )<br>(N = 897) | 2nd(0.051 to $\leq 0.060$ )<br>(N = 900) | 3rd(0.060 to $\leq 0.071$ )<br>(N = 894) | 4th( $> 0.071$ )<br>(N = 896) |                      |
| Sex                            |                                  |                                          |                                          |                               |                      |
| Male                           | 426/ 897 (47.5%)                 | 522/ 900 (58.0%)                         | 578/ 894 (64.7%)                         | 644/ 896 (71.9%)              | <0.001               |
| Female                         | 471/ 897 (52.5%)                 | 378/ 900 (42.0%)                         | 316/ 894 (35.3%)                         | 252/ 896 (28.1%)              |                      |
| Current smokers                |                                  |                                          |                                          |                               |                      |
| No                             | 788/ 897 (87.8%)                 | 778/ 900 (86.4%)                         | 738/ 894 (82.6%)                         | 750/ 896 (83.7%)              | 0.0022               |
| Yes                            | 109/ 897 (12.2%)                 | 122/ 900 (13.6%)                         | 156/ 894 (17.4%)                         | 146/ 896 (16.3%)              |                      |
| History of macrovascular event |                                  |                                          |                                          |                               |                      |
| No                             | 640/ 897 (71.3%)                 | 592/ 900 (65.8%)                         | 554/ 894 (62.0%)                         | 549/ 896 (61.3%)              | <0.001               |
| Yes                            | 257/ 897 (28.7%)                 | 308/ 900 (34.2%)                         | 340/ 894 (38.0%)                         | 347/ 896 (38.7%)              |                      |
| Age (years)                    |                                  |                                          |                                          |                               |                      |
| N                              | 897                              | 900                                      | 894                                      | 896                           | <0.001               |
| Mean (SD)                      | 67.9 (6.8)                       | 67.6 (6.3)                               | 66.7 (6.4)                               | 65.2 (6.5)                    |                      |
| Median (IRQ)                   | 68.0 (63.0, 72.0)                | 68.0 (63.0, 72.0)                        | 67.0 (61.0, 71.0)                        | 65.0 (60.0, 70.0)             |                      |
| Duration of diabetes (years)   |                                  |                                          |                                          |                               |                      |
| N                              | 897                              | 900                                      | 893                                      | 896                           | 0.7730               |
| Mean (SD)                      | 8.1 (7.0)                        | 7.8 (6.3)                                | 7.8 (6.4)                                | 8.0 (6.1)                     |                      |
| Median (IRQ)                   | 6.0 (3.0, 11.0)                  | 6.0 (3.0, 11.0)                          | 6.0 (3.0, 11.0)                          | 6.5 (3.0, 12.0)               |                      |
| BMI (Kg/m <sup>2</sup> )       |                                  |                                          |                                          |                               |                      |
| N                              | 897                              | 900                                      | 892                                      | 896                           | <0.001               |
| Mean (SD)                      | 28.8 (5.3)                       | 29.9 (5.2)                               | 30.5 (5.4)                               | 30.8 (4.9)                    |                      |

| Characteristics                                | Isoleucine (mmol/L)       |                                    |                                    |                          | p-value for trend |
|------------------------------------------------|---------------------------|------------------------------------|------------------------------------|--------------------------|-------------------|
|                                                | 1st(<=0.051)<br>(N = 897) | 2nd(0.051 to <=0.060)<br>(N = 900) | 3rd(0.060 to <=0.071)<br>(N = 894) | 4th(>0.071)<br>(N = 896) |                   |
| Median (IRQ)                                   | 28.0 (25.2, 31.6)         | 29.3 (26.5, 32.9)                  | 29.8 (27.0, 33.2)                  | 30.1 (27.4, 33.3)        |                   |
| History of heart failure                       |                           |                                    |                                    |                          |                   |
| No                                             | 858/ 897 (95.7%)          | 850/ 900 (94.4%)                   | 858/ 894 (96.0%)                   | 855/ 896 (95.4%)         | 0.7875            |
| Yes                                            | 39/ 897 (4.3%)            | 50/ 900 (5.6%)                     | 36/ 894 (4.0%)                     | 41/ 896 (4.6%)           |                   |
| Participation in moderate or vigorous activity |                           |                                    |                                    |                          |                   |
| No                                             | 473/ 897 (52.7%)          | 440/ 900 (48.9%)                   | 474/ 894 (53.0%)                   | 464/ 896 (51.8%)         | 0.8619            |
| Yes                                            | 424/ 897 (47.3%)          | 460/ 900 (51.1%)                   | 420/ 894 (47.0%)                   | 432/ 896 (48.2%)         |                   |
| SBP (mmHg)                                     |                           |                                    |                                    |                          |                   |
| N                                              | 897                       | 900                                | 893                                | 896                      |                   |
| Mean (SD)                                      | 146.0 (22.1)              | 147.3 (21.8)                       | 148.0 (21.5)                       | 147.4 (20.6)             | 0.1452            |
| Median (IRQ)                                   | 144.0 (130.5, 158.0)      | 145.0 (133.0, 159.5)               | 145.0 (133.5, 160.0)               | 146.5 (133.0, 160.0)     |                   |
| DBP (mmHg)                                     |                           |                                    |                                    |                          |                   |
| N                                              | 897                       | 900                                | 893                                | 896                      |                   |
| Mean (SD)                                      | 80.0 (10.7)               | 81.6 (10.7)                        | 82.3 (11.1)                        | 82.5 (10.8)              | <0.001            |
| Median (IRQ)                                   | 80.0 (72.5, 87.0)         | 81.0 (74.5, 88.0)                  | 81.5 (75.0, 89.0)                  | 82.0 (75.0, 90.0)        |                   |
| Total chol (mmol/l)                            |                           |                                    |                                    |                          |                   |
| N                                              | 897                       | 900                                | 893                                | 895                      |                   |
| Mean (SD)                                      | 5.1 (1.1)                 | 5.1 (1.1)                          | 5.1 (1.1)                          | 5.3 (1.3)                | 0.0092            |
| Median (IRQ)                                   | 5.0 (4.3, 5.8)            | 5.0 (4.3, 5.8)                     | 5.0 (4.3, 5.8)                     | 5.2 (4.4, 6.0)           |                   |
| HDL Chol (mmol/l)                              |                           |                                    |                                    |                          |                   |
| N                                              | 895                       | 900                                | 893                                | 894                      |                   |

| Characteristics                               | Isoleucine (mmol/L)       |                                    |                                    |                          | p-value<br>for trend |
|-----------------------------------------------|---------------------------|------------------------------------|------------------------------------|--------------------------|----------------------|
|                                               | 1st(<=0.051)<br>(N = 897) | 2nd(0.051 to <=0.060)<br>(N = 900) | 3rd(0.060 to <=0.071)<br>(N = 894) | 4th(>0.071)<br>(N = 896) |                      |
| Mean (SD)                                     | 1.3 (0.4)                 | 1.3 (0.3)                          | 1.2 (0.3)                          | 1.1 (0.3)                | <0.001               |
| Median (IRQ)                                  | 1.3 (1.1, 1.6)            | 1.2 (1.0, 1.4)                     | 1.2 (1.0, 1.4)                     | 1.1 (0.9, 1.3)           |                      |
| Triacylglycerol (mmol/l)                      |                           |                                    |                                    |                          |                      |
| N                                             | 897                       | 900                                | 893                                | 892                      |                      |
| Mean (SD)                                     | 1.4 (0.6)                 | 1.7 (0.7)                          | 2.0 (1.0)                          | 2.8 (1.7)                | <0.001               |
| Median (IRQ)                                  | 1.2 (0.9, 1.6)            | 1.5 (1.2, 2.0)                     | 1.8 (1.4, 2.4)                     | 2.5 (1.8, 3.4)           |                      |
| HbA1c (%)                                     |                           |                                    |                                    |                          |                      |
| N                                             | 894                       | 896                                | 889                                | 892                      |                      |
| Mean % (SD) [mmol/mol]                        | 7.2 (1.3) [55]            | 7.3 (1.4) [56]                     | 7.5 (1.4) [59]                     | 7.7 (1.5) [61]           | <0.001               |
| Urinary albumin:creatinine ratio<br>(mg/mmol) |                           |                                    |                                    |                          |                      |
| N                                             | 842                       | 853                                | 844                                | 833                      |                      |
| Median (IRQ)                                  | 1.7 (0.8, 4.5)            | 1.8 (0.8, 4.9)                     | 2.1 (0.9, 5.4)                     | 2.1 (0.9, 6.5)           | 0.2396               |
| Glucose (mmol/l)                              |                           |                                    |                                    |                          |                      |
| N                                             | 897                       | 900                                | 893                                | 895                      |                      |
| Mean (SD)                                     | 7.9 (2.5)                 | 8.1 (2.5)                          | 8.6 (2.7)                          | 9.2 (3.0)                | <0.001               |
| Median (IRQ)                                  | 7.5 (6.4, 8.9)            | 7.7 (6.4, 9.2)                     | 8.0 (6.7, 9.8)                     | 8.8 (7.0, 10.7)          |                      |
| eGFR (mL/min/1.73 m <sup>2</sup> )            |                           |                                    |                                    |                          |                      |
| N                                             | 894                       | 898                                | 889                                | 889                      |                      |
| Mean (SD)                                     | 70.8 (16.4)               | 71.7 (16.8)                        | 72.8 (16.3)                        | 71.8 (17.2)              | 0.0930               |
| Median (IRQ)                                  | 71.2 (59.2, 83.8)         | 72.3 (60.6, 85.5)                  | 72.9 (61.8, 85.0)                  | 71.5 (59.7, 85.7)        |                      |



| Characteristics   | Isoleucine (mmol/L)       |                                    |                                    |                          | p-value<br>for trend |
|-------------------|---------------------------|------------------------------------|------------------------------------|--------------------------|----------------------|
|                   | 1st(<=0.051)<br>(N = 897) | 2nd(0.051 to <=0.060)<br>(N = 900) | 3rd(0.060 to <=0.071)<br>(N = 894) | 4th(>0.071)<br>(N = 896) |                      |
| CRP (nmol/l)      |                           |                                    |                                    |                          |                      |
| N                 | 874                       | 877                                | 866                                | 874                      |                      |
| Mean (SD)         | 41.9 (97.1)               | 30.5 (57.1)                        | 36.2 (59.0)                        | 31.4 (41.9)              | 0.0091               |
| Median (IRQ)      | 15.2 (7.6, 40.0)          | 17.1 (8.6, 37.1)                   | 18.1 (8.6, 41.0)                   | 19.0 (9.5, 39.0)         |                      |
| hs-cTnT (ng/l)    |                           |                                    |                                    |                          |                      |
| N                 | 873                       | 877                                | 864                                | 874                      |                      |
| Mean (SD)         | 8.4 (12.2)                | 8.2 (10.2)                         | 9.9 (31.8)                         | 9.1 (18.0)               | 0.2203               |
| Median (IRQ)      | 5.0 (1.5, 11.0)           | 5.0 (1.5, 11.0)                    | 5.0 (1.5, 11.0)                    | 6.0 (1.5, 11.0)          |                      |
| NT-proBNP (pg/mL) |                           |                                    |                                    |                          |                      |
| N                 | 873                       | 877                                | 864                                | 874                      |                      |
| Mean (SD)         | 324.9 (1392.9)            | 268.0 (609.5)                      | 223.3 (469.3)                      | 197.6 (703.4)            | 0.0012               |
| Median (IRQ)      | 103.0 (46.0, 252.0)       | 89.0 (35.0, 222.0)                 | 85.0 (30.5, 212.0)                 | 70.0 (27.0, 179.0)       |                      |

Values are n (%), mean (standard deviation), or median (interquartile range)

ESM Table 4 Baseline characteristics classified by quarters of the glutamine distribution

| Characteristics                | Glutamine (mmol/L)               |                                          |                                          |                               | p-value for trend |
|--------------------------------|----------------------------------|------------------------------------------|------------------------------------------|-------------------------------|-------------------|
|                                | 1st( $\leq 0.310$ )<br>(N = 557) | 2nd(0.310 to $\leq 0.396$ )<br>(N = 557) | 3rd(0.396 to $\leq 0.456$ )<br>(N = 557) | 4th( $> 0.456$ )<br>(N = 557) |                   |
| Sex                            |                                  |                                          |                                          |                               |                   |
| Male                           | 307/ 557 (55.1%)                 | 347/ 557 (62.3%)                         | 363/ 557 (65.2%)                         | 365/ 557 (65.5%)              | <0.001            |
| Female                         | 250/ 557 (44.9%)                 | 210/ 557 (37.7%)                         | 194/ 557 (34.8%)                         | 192/ 557 (34.5%)              |                   |
| Current smokers                |                                  |                                          |                                          |                               |                   |
| No                             | 482/ 557 (86.5%)                 | 467/ 557 (83.8%)                         | 473/ 557 (84.9%)                         | 471/ 557 (84.6%)              | 0.4742            |
| Yes                            | 75/ 557 (13.5%)                  | 90/ 557 (16.2%)                          | 84/ 557 (15.1%)                          | 86/ 557 (15.4%)               |                   |
| History of macrovascular event |                                  |                                          |                                          |                               |                   |
| No                             | 378/ 557 (67.9%)                 | 364/ 557 (65.4%)                         | 347/ 557 (62.3%)                         | 338/ 557 (60.7%)              | 0.0069            |
| Yes                            | 179/ 557 (32.1%)                 | 193/ 557 (34.6%)                         | 210/ 557 (37.7%)                         | 219/ 557 (39.3%)              |                   |
| Age (years)                    |                                  |                                          |                                          |                               |                   |
| N                              | 557                              | 557                                      | 557                                      | 557                           | 0.3772            |
| Mean (SD)                      | 66.7 (6.6)                       | 66.5 (6.5)                               | 66.7 (6.4)                               | 67.0 (6.6)                    |                   |
| Median (IRQ)                   | 67.0 (62.0, 72.0)                | 67.0 (61.0, 71.0)                        | 67.0 (62.0, 71.0)                        | 67.0 (62.0, 72.0)             |                   |
| Duration of diabetes (years)   |                                  |                                          |                                          |                               |                   |
| N                              | 557                              | 557                                      | 557                                      | 557                           | <0.001            |
| Mean (SD)                      | 8.5 (6.8)                        | 8.0 (6.5)                                | 7.1 (5.9)                                | 7.4 (6.3)                     |                   |
| Median (IRQ)                   | 7.0 (3.0, 12.0)                  | 7.0 (3.0, 11.0)                          | 6.0 (2.0, 10.0)                          | 6.0 (2.0, 11.0)               |                   |
| BMI (Kg/m <sup>2</sup> )       |                                  |                                          |                                          |                               |                   |
| N                              | 557                              | 555                                      | 557                                      | 557                           | <0.001            |
| Mean (SD)                      | 30.1 (4.9)                       | 30.5 (5.5)                               | 29.9 (5.2)                               | 28.8 (5.1)                    |                   |

| Characteristics                                | Glutamine (mmol/L)        |                                    |                                    |                          | p-value for trend |
|------------------------------------------------|---------------------------|------------------------------------|------------------------------------|--------------------------|-------------------|
|                                                | 1st(<=0.310)<br>(N = 557) | 2nd(0.310 to <=0.396)<br>(N = 557) | 3rd(0.396 to <=0.456)<br>(N = 557) | 4th(>0.456)<br>(N = 557) |                   |
| Median (IRQ)                                   | 29.7 (26.7, 32.9)         | 29.7 (26.6, 33.5)                  | 29.2 (26.5, 32.5)                  | 27.9 (25.5, 31.1)        |                   |
| History of heart failure                       |                           |                                    |                                    |                          |                   |
| No                                             | 529/ 557 (95.0%)          | 536/ 557 (96.2%)                   | 539/ 557 (96.8%)                   | 544/ 557 (97.7%)         | 0.0154            |
| Yes                                            | 28/ 557 (5.0%)            | 21/ 557 (3.8%)                     | 18/ 557 (3.2%)                     | 13/ 557 (2.3%)           |                   |
| Participation in moderate or vigorous activity |                           |                                    |                                    |                          |                   |
| No                                             | 273/ 557 (49.0%)          | 310/ 557 (55.7%)                   | 278/ 557 (49.9%)                   | 284/ 557 (51.0%)         | 0.9849            |
| Yes                                            | 284/ 557 (51.0%)          | 247/ 557 (44.3%)                   | 279/ 557 (50.1%)                   | 273/ 557 (49.0%)         |                   |
| SBP (mmHg)                                     |                           |                                    |                                    |                          |                   |
| N                                              | 557                       | 557                                | 557                                | 557                      | 0.2289            |
| Mean (SD)                                      | 146.7 (21.6)              | 147.1 (20.9)                       | 145.9 (21.3)                       | 145.5 (22.3)             |                   |
| Median (IRQ)                                   | 145.5 (131.0, 160.0)      | 145.5 (133.5, 158.5)               | 143.5 (131.5, 158.0)               | 143.5 (130.0, 159.0)     |                   |
| DBP (mmHg)                                     |                           |                                    |                                    |                          |                   |
| N                                              | 557                       | 557                                | 557                                | 557                      | 0.1532            |
| Mean (SD)                                      | 81.3 (10.8)               | 81.4 (10.8)                        | 81.1 (10.3)                        | 80.5 (10.8)              |                   |
| Median (IRQ)                                   | 81.0 (74.0, 88.5)         | 81.5 (74.0, 88.5)                  | 81.0 (74.0, 88.0)                  | 80.0 (73.0, 87.5)        |                   |
| Total chol (mmol/l)                            |                           |                                    |                                    |                          |                   |
| N                                              | 556                       | 557                                | 556                                | 557                      | 0.0449            |
| Mean (SD)                                      | 5.1 (1.1)                 | 5.1 (1.0)                          | 5.0 (1.1)                          | 5.0 (1.1)                |                   |
| Median (IRQ)                                   | 5.1 (4.3, 5.9)            | 5.0 (4.4, 5.8)                     | 4.9 (4.3, 5.7)                     | 4.9 (4.3, 5.7)           |                   |
| HDL Chol (mmol/l)                              |                           |                                    |                                    |                          |                   |
| N                                              | 556                       | 557                                | 555                                | 557                      |                   |

| Characteristics                               | Glutamine (mmol\L)        |                                    |                                    |                          | p-value<br>for trend |
|-----------------------------------------------|---------------------------|------------------------------------|------------------------------------|--------------------------|----------------------|
|                                               | 1st(<=0.310)<br>(N = 557) | 2nd(0.310 to <=0.396)<br>(N = 557) | 3rd(0.396 to <=0.456)<br>(N = 557) | 4th(>0.456)<br>(N = 557) |                      |
| Mean (SD)                                     | 1.2 (0.3)                 | 1.2 (0.3)                          | 1.2 (0.3)                          | 1.3 (0.4)                | 0.0011               |
| Median (IRQ)                                  | 1.1 (1.0, 1.4)            | 1.2 (1.0, 1.4)                     | 1.2 (1.0, 1.4)                     | 1.2 (1.0, 1.5)           |                      |
| Triacylglycerol (mmol/l)                      |                           |                                    |                                    |                          |                      |
| N                                             | 555                       | 557                                | 556                                | 557                      |                      |
| Mean (SD)                                     | 2.0 (1.3)                 | 2.0 (1.3)                          | 1.9 (0.9)                          | 1.8 (1.0)                | <0.001               |
| Median (IRQ)                                  | 1.7 (1.2, 2.4)            | 1.7 (1.3, 2.4)                     | 1.7 (1.3, 2.3)                     | 1.5 (1.1, 2.1)           |                      |
| HbA1c (%)                                     |                           |                                    |                                    |                          |                      |
| N                                             | 556                       | 556                                | 555                                | 555                      |                      |
| Mean % (SD) [mmol/mol]                        | 7.6 (1.6) [60]            | 7.4 (1.4) [57]                     | 7.3 (1.2) [56]                     | 6.9 (1.0) [52]           | <0.001               |
| Urinary albumin:creatinine ratio<br>(mg/mmol) |                           |                                    |                                    |                          |                      |
| N                                             | 522                       | 520                                | 527                                | 529                      |                      |
| Median (IRQ)                                  | 1.9 (0.9, 5.5)            | 1.6 (0.7, 5.8)                     | 1.5 (0.7, 4)                       | 1.5 (0.7, 4.4)           | 0.0977               |
| Glucose (mmol/l)                              |                           |                                    |                                    |                          |                      |
| N                                             | 556                       | 556                                | 557                                | 557                      |                      |
| Mean (SD)                                     | 8.9 (3.1)                 | 8.6 (2.8)                          | 8.4 (2.4)                          | 7.6 (1.9)                | <0.001               |
| Median (IRQ)                                  | 8.2 (6.8, 10.3)           | 8.1 (6.7, 10.2)                    | 8.0 (6.7, 9.7)                     | 7.4 (6.3, 8.5)           |                      |
| eGFR (mL/min/1.73 m <sup>2</sup> )            |                           |                                    |                                    |                          |                      |
| N                                             | 554                       | 556                                | 554                                | 554                      |                      |
| Mean (SD)                                     | 70.9 (16.6)               | 71.7 (16.9)                        | 72.0 (15.5)                        | 71.7 (16.6)              | 0.3863               |
| Median (IRQ)                                  | 69.9 (59.4, 83.6)         | 70.1 (59.6, 86.1)                  | 72.2 (60.9, 84.3)                  | 72.5 (61.4, 83.9)        |                      |

| Characteristics   | Glutamine (mmol\L)        |                                    |                                    |                          | p-value<br>for trend |
|-------------------|---------------------------|------------------------------------|------------------------------------|--------------------------|----------------------|
|                   | 1st(<=0.310)<br>(N = 557) | 2nd(0.310 to <=0.396)<br>(N = 557) | 3rd(0.396 to <=0.456)<br>(N = 557) | 4th(>0.456)<br>(N = 557) |                      |
| CRP (nmol/l)      |                           |                                    |                                    |                          |                      |
| N                 | 533                       | 544                                | 545                                | 543                      |                      |
| Mean (SD)         | 41.9 (97.1)               | 42.9 (68.6)                        | 28.6 (37.1)                        | 21.9 (30.5)              | <0.001               |
| Median (IRQ)      | 19.0 (8.6, 42.9)          | 21.0 (9.5, 45.7)                   | 17.1 (9.5, 36.2)                   | 12.4 (6.7, 24.8)         |                      |
| hs-cTnT (ng/l)    |                           |                                    |                                    |                          |                      |
| N                 | 533                       | 544                                | 544                                | 542                      |                      |
| Mean (SD)         | 11.2 (43.0)               | 8.9 (14.7)                         | 7.9 (9.5)                          | 8.5 (10.3)               | 0.0433               |
| Median (IRQ)      | 5.0 (1.5, 11.0)           | 5.0 (1.5, 11.0)                    | 5.0 (1.5, 10.0)                    | 6.0 (1.5, 11.0)          |                      |
| NT-proBNP (pg/mL) |                           |                                    |                                    |                          |                      |
| N                 | 533                       | 544                                | 544                                | 542                      |                      |
| Mean (SD)         | 252.8 (662.7)             | 267.3 (1528.5)                     | 181.1 (301.6)                      | 266.2 (952.0)            | 0.8065               |
| Median (IRQ)      | 78.0 (29.0, 216.0)        | 91.5 (36.5, 225.5)                 | 78.0 (31.0, 187.0)                 | 93.0 (34.0, 200.0)       |                      |

Values are n (%), mean (standard deviation), or median (interquartile range)

ESM Table 5 Baseline characteristics classified by quarters of the leucine distribution

| Characteristics                | Leucine (mmol/L)          |                                    |                                    |                          | p-value<br>for trend |
|--------------------------------|---------------------------|------------------------------------|------------------------------------|--------------------------|----------------------|
|                                | 1st(<=0.069)<br>(N = 896) | 2nd(0.069 to <=0.080)<br>(N = 897) | 3rd(0.080 to <=0.092)<br>(N = 895) | 4th(>0.092)<br>(N = 895) |                      |
| Sex                            |                           |                                    |                                    |                          |                      |
| Male                           | 434/ 896 (48.4%)          | 502/ 897 (56.0%)                   | 579/ 895 (64.7%)                   | 653/ 895 (73.0%)         | <0.001               |
| Female                         | 462/ 896 (51.6%)          | 395/ 897 (44.0%)                   | 316/ 895 (35.3%)                   | 242/ 895 (27.0%)         |                      |
| Current smokers                |                           |                                    |                                    |                          |                      |
| No                             | 794/ 896 (88.6%)          | 767/ 897 (85.5%)                   | 745/ 895 (83.2%)                   | 746/ 895 (83.4%)         | <0.001               |
| Yes                            | 102/ 896 (11.4%)          | 130/ 897 (14.5%)                   | 150/ 895 (16.8%)                   | 149/ 895 (16.6%)         |                      |
| History of macrovascular event |                           |                                    |                                    |                          |                      |
| No                             | 612/ 896 (68.3%)          | 576/ 897 (64.2%)                   | 589/ 895 (65.8%)                   | 555/ 895 (62.0%)         | 0.0153               |
| Yes                            | 284/ 896 (31.7%)          | 321/ 897 (35.8%)                   | 306/ 895 (34.2%)                   | 340/ 895 (38.0%)         |                      |
| Age (years)                    |                           |                                    |                                    |                          |                      |
| N                              | 896                       | 897                                | 895                                | 895                      |                      |
| Mean (SD)                      | 68.0 (6.8)                | 67.5 (6.5)                         | 66.8 (6.4)                         | 65.0 (6.3)               | <0.001               |
| Median (IRQ)                   | 69.0 (63.5, 73.0)         | 68.0 (63.0, 72.0)                  | 67.0 (62.0, 71.0)                  | 65.0 (60.0, 70.0)        |                      |
| Duration of diabetes (years)   |                           |                                    |                                    |                          |                      |
| N                              | 896                       | 897                                | 894                                | 895                      |                      |
| Mean (SD)                      | 8.2 (7.2)                 | 7.9 (6.4)                          | 7.5 (6.2)                          | 8.0 (6.0)                | 0.2179               |
| Median (IRQ)                   | 6.0 (3.0, 11.0)           | 7.0 (3.0, 11.0)                    | 6.0 (2.0, 11.0)                    | 7.0 (3.0, 12.0)          |                      |
| BMI (Kg/m <sup>2</sup> )       |                           |                                    |                                    |                          |                      |
| N                              | 896                       | 897                                | 893                                | 895                      |                      |
| Mean (SD)                      | 28.9 (5.3)                | 30.1 (5.5)                         | 30.3 (5.2)                         | 30.7 (4.8)               | <0.001               |

| Characteristics                                | Leucine (mmol/L)          |                                    |                                    |                          | p-value<br>for trend |
|------------------------------------------------|---------------------------|------------------------------------|------------------------------------|--------------------------|----------------------|
|                                                | 1st(<=0.069)<br>(N = 896) | 2nd(0.069 to <=0.080)<br>(N = 897) | 3rd(0.080 to <=0.092)<br>(N = 895) | 4th(>0.092)<br>(N = 895) |                      |
| Median (IRQ)                                   | 28.2 (25.4, 31.6)         | 29.4 (26.3, 33.2)                  | 29.7 (26.7, 33.0)                  | 30.1 (27.4, 33.3)        |                      |
| History of heart failure                       |                           |                                    |                                    |                          |                      |
| No                                             | 854/ 896 (95.3%)          | 850/ 897 (94.8%)                   | 861/ 895 (96.2%)                   | 852/ 895 (95.2%)         | 0.7284               |
| Yes                                            | 42/ 896 (4.7%)            | 47/ 897 (5.2%)                     | 34/ 895 (3.8%)                     | 43/ 895 (4.8%)           |                      |
| Participation in moderate or vigorous activity |                           |                                    |                                    |                          |                      |
| No                                             | 483/ 896 (53.9%)          | 438/ 897 (48.8%)                   | 480/ 895 (53.6%)                   | 447/ 895 (49.9%)         | 0.3431               |
| Yes                                            | 413/ 896 (46.1%)          | 459/ 897 (51.2%)                   | 415/ 895 (46.4%)                   | 448/ 895 (50.1%)         |                      |
| SBP (mmHg)                                     |                           |                                    |                                    |                          |                      |
| N                                              | 896                       | 896                                | 895                                | 895                      | 0.6098               |
| Mean (SD)                                      | 146.6 (22.6)              | 147.8 (21.6)                       | 146.8 (21.0)                       | 147.5 (20.7)             |                      |
| Median (IRQ)                                   | 144.5 (130.8, 159.0)      | 146.0 (133.0, 160.0)               | 144.5 (133.0, 158.0)               | 146.5 (133.0, 160.0)     |                      |
| DBP (mmHg)                                     |                           |                                    |                                    |                          |                      |
| N                                              | 896                       | 896                                | 895                                | 895                      | <0.001               |
| Mean (SD)                                      | 80.1 (10.7)               | 81.8 (11.1)                        | 81.7 (10.7)                        | 82.8 (10.7)              |                      |
| Median (IRQ)                                   | 80.0 (72.5, 87.0)         | 81.5 (74.8, 88.5)                  | 81.0 (74.5, 88.5)                  | 82.5 (75.0, 90.0)        |                      |
| Total chol (mmol/l)                            |                           |                                    |                                    |                          |                      |
| N                                              | 896                       | 897                                | 894                                | 894                      | 0.0765               |
| Mean (SD)                                      | 5.1 (1.1)                 | 5.1 (1.1)                          | 5.1 (1.1)                          | 5.2 (1.3)                |                      |
| Median (IRQ)                                   | 5.0 (4.3, 5.9)            | 5.0 (4.3, 5.8)                     | 5.0 (4.3, 5.8)                     | 5.1 (4.3, 5.9)           |                      |
| HDL Chol (mmol/l)                              |                           |                                    |                                    |                          |                      |
| N                                              | 895                       | 897                                | 893                                | 893                      |                      |

| Characteristics                               | Leucine (mmol/L)          |                                    |                                    |                          | p-value<br>for trend |
|-----------------------------------------------|---------------------------|------------------------------------|------------------------------------|--------------------------|----------------------|
|                                               | 1st(<=0.069)<br>(N = 896) | 2nd(0.069 to <=0.080)<br>(N = 897) | 3rd(0.080 to <=0.092)<br>(N = 895) | 4th(>0.092)<br>(N = 895) |                      |
| Mean (SD)                                     | 1.3 (0.4)                 | 1.3 (0.3)                          | 1.2 (0.3)                          | 1.1 (0.3)                | <0.001               |
| Median (IRQ)                                  | 1.3 (1.0, 1.5)            | 1.2 (1.0, 1.4)                     | 1.2 (1.0, 1.4)                     | 1.1 (0.9, 1.3)           |                      |
| Triacylglycerol (mmol/l)                      |                           |                                    |                                    |                          |                      |
| N                                             | 896                       | 897                                | 894                                | 891                      |                      |
| Mean (SD)                                     | 1.4 (0.7)                 | 1.7 (0.7)                          | 2.0 (1.0)                          | 2.7 (1.8)                | <0.001               |
| Median (IRQ)                                  | 1.3 (1.0, 1.7)            | 1.5 (1.2, 2.0)                     | 1.8 (1.4, 2.4)                     | 2.3 (1.6, 3.2)           |                      |
| HbA1c (%)                                     |                           |                                    |                                    |                          |                      |
| N                                             | 894                       | 892                                | 892                                | 889                      |                      |
| Mean % (SD) [mmol/mol]                        | 7.2 (1.4) [55]            | 7.3 (1.4) [56]                     | 7.4 (1.4) [57]                     | 7.7 (1.5) [61]           | <0.001               |
| Urinary albumin:creatinine ratio<br>(mg/mmol) |                           |                                    |                                    |                          |                      |
| N                                             | 843                       | 850                                | 839                                | 836                      |                      |
| Median (IRQ)                                  | 1.8 (0.8, 4.9)            | 1.9 (0.8, 5.1)                     | 2 (0.9, 5.3)                       | 2 (0.9, 6.3)             | 0.7714               |
| Glucose (mmol/l)                              |                           |                                    |                                    |                          |                      |
| N                                             | 896                       | 897                                | 894                                | 894                      |                      |
| Mean (SD)                                     | 7.9 (2.5)                 | 8.1 (2.5)                          | 8.5 (2.6)                          | 9.3 (3.0)                | <0.001               |
| Median (IRQ)                                  | 7.5 (6.3, 8.9)            | 7.7 (6.4, 9.2)                     | 8.0 (6.7, 9.8)                     | 8.8 (7.2, 10.8)          |                      |
| eGFR (mL/min/1.73 m <sup>2</sup> )            |                           |                                    |                                    |                          |                      |
| N                                             | 894                       | 892                                | 892                                | 888                      |                      |
| Mean (SD)                                     | 70.2 (17.2)               | 71.1 (16.7)                        | 72.6 (16.5)                        | 73.4 (16.3)              | <0.001               |
| Median (IRQ)                                  | 70.3 (57.9, 83.6)         | 71.8 (59.7, 84.7)                  | 72.5 (62.0, 86.0)                  | 73.7 (62.3, 86.2)        |                      |



| Characteristics   | Leucine (mmol/L)          |                                    |                                    |                          | p-value<br>for trend |
|-------------------|---------------------------|------------------------------------|------------------------------------|--------------------------|----------------------|
|                   | 1st(<=0.069)<br>(N = 896) | 2nd(0.069 to <=0.080)<br>(N = 897) | 3rd(0.080 to <=0.092)<br>(N = 895) | 4th(>0.092)<br>(N = 895) |                      |
| CRP (nmol/l)      |                           |                                    |                                    |                          |                      |
| N                 | 872                       | 871                                | 876                                | 872                      |                      |
| Mean (SD)         | 37.1 (84.8)               | 33.3 (61.0)                        | 32.4 (48.6)                        | 36.2 (69.5)              | 0.6817               |
| Median (IRQ)      | 15.2 (7.6, 38.1)          | 18.1 (8.6, 39.0)                   | 17.1 (8.6, 39.0)                   | 19.0 (8.6, 41.0)         |                      |
| hs-cTnT (ng/l)    |                           |                                    |                                    |                          |                      |
| N                 | 871                       | 871                                | 874                                | 872                      |                      |
| Mean (SD)         | 9.0 (12.7)                | 8.8 (13.0)                         | 8.4 (26.9)                         | 9.3 (23.0)               | 0.9453               |
| Median (IRQ)      | 5.0 (1.5, 11.0)           | 5.0 (1.5, 12.0)                    | 5.0 (1.5, 10.0)                    | 5.0 (1.5, 11.0)          |                      |
| NT-proBNP (pg/mL) |                           |                                    |                                    |                          |                      |
| N                 | 871                       | 871                                | 874                                | 872                      |                      |
| Mean (SD)         | 391.2 (1564.3)            | 268.2 (554.7)                      | 190.1 (402.4)                      | 164.9 (307.3)            | <0.001               |
| Median (IRQ)      | 117.0 (51.0, 286.0)       | 100.0 (38.0, 229.0)                | 74.0 (31.0, 186.0)                 | 65.0 (22.0, 164.0)       |                      |

Values are n (%), mean (standard deviation), or median (interquartile range)

ESM Table 6 Baseline characteristics classified by quarters of the alanine distribution

| Characteristics                | Alanine (mmol/L)                 |                                          |                                          |                               | p-value<br>for trend |
|--------------------------------|----------------------------------|------------------------------------------|------------------------------------------|-------------------------------|----------------------|
|                                | 1st( $\leq 0.326$ )<br>(N = 897) | 2nd(0.326 to $\leq 0.365$ )<br>(N = 897) | 3rd(0.365 to $\leq 0.407$ )<br>(N = 897) | 4th( $> 0.407$ )<br>(N = 895) |                      |
| Sex                            |                                  |                                          |                                          |                               |                      |
| Male                           | 591/ 897 (65.9%)                 | 565/ 897 (63.0%)                         | 511/ 897 (57.0%)                         | 503/ 895 (56.2%)              | <0.001               |
| Female                         | 306/ 897 (34.1%)                 | 332/ 897 (37.0%)                         | 386/ 897 (43.0%)                         | 392/ 895 (43.8%)              |                      |
| Current smokers                |                                  |                                          |                                          |                               |                      |
| No                             | 760/ 897 (84.7%)                 | 773/ 897 (86.2%)                         | 738/ 897 (82.3%)                         | 783/ 895 (87.5%)              | 0.4112               |
| Yes                            | 137/ 897 (15.3%)                 | 124/ 897 (13.8%)                         | 159/ 897 (17.7%)                         | 112/ 895 (12.5%)              |                      |
| History of macrovascular event |                                  |                                          |                                          |                               |                      |
| No                             | 613/ 897 (68.3%)                 | 589/ 897 (65.7%)                         | 600/ 897 (66.9%)                         | 532/ 895 (59.4%)              | <0.001               |
| Yes                            | 284/ 897 (31.7%)                 | 308/ 897 (34.3%)                         | 297/ 897 (33.1%)                         | 363/ 895 (40.6%)              |                      |
| Age (years)                    |                                  |                                          |                                          |                               |                      |
| N                              | 897                              | 897                                      | 897                                      | 895                           | <0.001               |
| Mean (SD)                      | 67.5 (6.8)                       | 67.4 (6.3)                               | 66.2 (6.5)                               | 66.2 (6.5)                    |                      |
| Median (IRQ)                   | 68.0 (63.0, 72.0)                | 67.0 (63.0, 72.0)                        | 66.0 (61.0, 71.0)                        | 67.0 (61.0, 71.0)             |                      |
| Duration of diabetes (years)   |                                  |                                          |                                          |                               |                      |
| N                              | 896                              | 897                                      | 897                                      | 895                           | 0.2860               |
| Mean (SD)                      | 8.4 (6.9)                        | 7.7 (6.4)                                | 7.4 (6.3)                                | 8.2 (6.3)                     |                      |
| Median (IRQ)                   | 7.0 (3.0, 12.0)                  | 6.0 (3.0, 11.0)                          | 6.0 (2.0, 11.0)                          | 7.0 (3.0, 12.0)               |                      |
| BMI (Kg/m <sup>2</sup> )       |                                  |                                          |                                          |                               |                      |
| N                              | 897                              | 896                                      | 896                                      | 895                           | <0.001               |
| Mean (SD)                      | 29.2 (5.1)                       | 29.9 (5.3)                               | 30.6 (5.6)                               | 30.3 (4.9)                    |                      |

| Characteristics                                | Alanine (mmol/L)          |                                    |                                    |                          | p-value<br>for trend |
|------------------------------------------------|---------------------------|------------------------------------|------------------------------------|--------------------------|----------------------|
|                                                | 1st(<=0.326)<br>(N = 897) | 2nd(0.326 to <=0.365)<br>(N = 897) | 3rd(0.365 to <=0.407)<br>(N = 897) | 4th(>0.407)<br>(N = 895) |                      |
| Median (IRQ)                                   | 28.6 (25.7, 32.2)         | 29.1 (26.3, 32.8)                  | 29.7 (26.8, 33.3)                  | 29.7 (27.0, 32.8)        |                      |
| History of heart failure                       |                           |                                    |                                    |                          |                      |
| No                                             | 857/ 897 (95.5%)          | 856/ 897 (95.4%)                   | 853/ 897 (95.1%)                   | 854/ 895 (95.4%)         | 0.8234               |
| Yes                                            | 40/ 897 (4.5%)            | 41/ 897 (4.6%)                     | 44/ 897 (4.9%)                     | 41/ 895 (4.6%)           |                      |
| Participation in moderate or vigorous activity |                           |                                    |                                    |                          |                      |
| No                                             | 479/ 897 (53.4%)          | 457/ 897 (50.9%)                   | 452/ 897 (50.4%)                   | 462/ 895 (51.6%)         | 0.4291               |
| Yes                                            | 418/ 897 (46.6%)          | 440/ 897 (49.1%)                   | 445/ 897 (49.6%)                   | 433/ 895 (48.4%)         |                      |
| SBP (mmHg)                                     |                           |                                    |                                    |                          |                      |
| N                                              | 897                       | 896                                | 897                                | 895                      |                      |
| Mean (SD)                                      | 146.7 (21.4)              | 147.5 (21.6)                       | 147.1 (21.0)                       | 147.4 (22.0)             | 0.5705               |
| Median (IRQ)                                   | 145.0 (131.5, 159.5)      | 145.0 (133.0, 158.5)               | 145.0 (133.0, 160.0)               | 145.0 (132.0, 160.0)     |                      |
| DBP (mmHg)                                     |                           |                                    |                                    |                          |                      |
| N                                              | 897                       | 896                                | 897                                | 895                      |                      |
| Mean (SD)                                      | 80.8 (10.8)               | 81.4 (10.6)                        | 81.7 (10.6)                        | 82.5 (11.4)              | 0.0014               |
| Median (IRQ)                                   | 80.0 (73.5, 88.0)         | 80.8 (73.8, 88.5)                  | 81.5 (75.0, 88.5)                  | 82.0 (74.5, 90.0)        |                      |
| Total chol (mmol/l)                            |                           |                                    |                                    |                          |                      |
| N                                              | 896                       | 897                                | 897                                | 894                      |                      |
| Mean (SD)                                      | 5.0 (1.1)                 | 5.1 (1.1)                          | 5.2 (1.3)                          | 5.2 (1.2)                | 0.0012               |
| Median (IRQ)                                   | 4.9 (4.2, 5.7)            | 5.1 (4.3, 5.9)                     | 5.1 (4.4, 5.9)                     | 5.1 (4.4, 5.9)           |                      |
| HDL Chol (mmol/l)                              |                           |                                    |                                    |                          |                      |
| N                                              | 895                       | 897                                | 896                                | 893                      |                      |

| Characteristics                            | Alanine (mmol/L)          |                                    |                                    |                          | p-value for trend |
|--------------------------------------------|---------------------------|------------------------------------|------------------------------------|--------------------------|-------------------|
|                                            | 1st(<=0.326)<br>(N = 897) | 2nd(0.326 to <=0.365)<br>(N = 897) | 3rd(0.365 to <=0.407)<br>(N = 897) | 4th(>0.407)<br>(N = 895) |                   |
| Mean (SD)                                  | 1.2 (0.3)                 | 1.2 (0.3)                          | 1.2 (0.3)                          | 1.2 (0.3)                | 0.8507            |
| Median (IRQ)                               | 1.2 (1.0, 1.4)            | 1.2 (1.0, 1.4)                     | 1.2 (1.0, 1.4)                     | 1.2 (1.0, 1.4)           |                   |
| Triacylglycerol (mmol/l)                   |                           |                                    |                                    |                          |                   |
| N                                          | 896                       | 896                                | 896                                | 893                      |                   |
| Mean (SD)                                  | 1.6 (1.0)                 | 1.9 (1.1)                          | 2.1 (1.3)                          | 2.3 (1.4)                | <0.001            |
| Median (IRQ)                               | 1.4 (1.0, 1.8)            | 1.6 (1.2, 2.3)                     | 1.8 (1.4, 2.5)                     | 1.9 (1.5, 2.7)           |                   |
| HbA1c (%)                                  |                           |                                    |                                    |                          |                   |
| N                                          | 893                       | 892                                | 893                                | 892                      |                   |
| Mean % (SD) [mmol/mol]                     | 7.3 (1.5) [56]            | 7.4 (1.5) [57]                     | 7.4 (1.4) [57]                     | 7.5 (1.4) [59]           | 0.0175            |
| Urinary albumin:creatinine ratio (mg/mmol) |                           |                                    |                                    |                          |                   |
| N                                          | 842                       | 851                                | 833                                | 845                      |                   |
| Median (IRQ)                               | 1.8 (0.8, 5.5)            | 1.9 (0.8, 4.9)                     | 1.9 (0.8, 4.8)                     | 2.1 (0.9, 6)             | 0.1522            |
| Glucose (mmol/l)                           |                           |                                    |                                    |                          |                   |
| N                                          | 897                       | 897                                | 896                                | 894                      |                   |
| Mean (SD)                                  | 8.1 (2.7)                 | 8.4 (2.7)                          | 8.5 (2.7)                          | 8.9 (2.7)                | <0.001            |
| Median (IRQ)                               | 7.6 (6.4, 9.3)            | 7.9 (6.6, 9.6)                     | 8.0 (6.7, 9.7)                     | 8.3 (7.0, 10.3)          |                   |
| eGFR (mL/min/1.73 m <sup>2</sup> )         |                           |                                    |                                    |                          |                   |
| N                                          | 893                       | 894                                | 891                                | 891                      |                   |
| Mean (SD)                                  | 71.7 (16.8)               | 71.3 (17.0)                        | 72.1 (16.9)                        | 72.1 (16.3)              | 0.4152            |
| Median (IRQ)                               | 72.2 (59.4, 85.0)         | 71.5 (60.4, 84.2)                  | 72.9 (61.1, 85.3)                  | 71.7 (60.1, 85.4)        |                   |

| Characteristics   | Alanine (mmol/L)          |                                    |                                    |                          | p-value for trend |
|-------------------|---------------------------|------------------------------------|------------------------------------|--------------------------|-------------------|
|                   | 1st(<=0.326)<br>(N = 897) | 2nd(0.326 to <=0.365)<br>(N = 897) | 3rd(0.365 to <=0.407)<br>(N = 897) | 4th(>0.407)<br>(N = 895) |                   |
| CRP (nmol/l)      |                           |                                    |                                    |                          |                   |
| N                 | 877                       | 871                                | 874                                | 869                      |                   |
| Mean (SD)         | 49.5 (109.5)              | 32.4 (43.8)                        | 32.4 (48.6)                        | 25.7 (39.0)              | <0.001            |
| Median (IRQ)      | 19.0 (8.6, 49.5)          | 16.2 (8.6, 39.0)                   | 19.0 (8.6, 41.0)                   | 15.2 (7.6, 30.5)         |                   |
| hs-cTnT (ng/l)    |                           |                                    |                                    |                          |                   |
| N                 | 876                       | 871                                | 872                                | 869                      |                   |
| Mean (SD)         | 10.4 (29.0)               | 9.3 (18.4)                         | 8.0 (17.0)                         | 7.8 (10.3)               | 0.0025            |
| Median (IRQ)      | 5.0 (1.5, 12.0)           | 5.0 (1.5, 12.0)                    | 5.0 (1.5, 10.0)                    | 5.0 (1.5, 10.0)          |                   |
| NT-proBNP (pg/mL) |                           |                                    |                                    |                          |                   |
| N                 | 876                       | 871                                | 872                                | 869                      |                   |
| Mean (SD)         | 306.6 (789.9)             | 320.6 (1458.9)                     | 186.7 (367.0)                      | 199.9 (371.1)            | <0.001            |
| Median (IRQ)      | 105.0 (42.0, 259.0)       | 90.0 (37.0, 246.0)                 | 73.5 (32.0, 168.5)                 | 85.0 (28.0, 203.0)       |                   |

Values are n (%), mean (standard deviation), or median (interquartile range)

ESM Table 7 Baseline characteristics classified by quarters of the tyrosine distribution

| Characteristics                | Tyrosine (mmol/L)         |                                    |                                    |                          | p-value for trend |
|--------------------------------|---------------------------|------------------------------------|------------------------------------|--------------------------|-------------------|
|                                | 1st(<=0.045)<br>(N = 897) | 2nd(0.045 to <=0.052)<br>(N = 893) | 3rd(0.052 to <=0.059)<br>(N = 895) | 4th(>0.059)<br>(N = 894) |                   |
| Sex                            |                           |                                    |                                    |                          |                   |
| Male                           | 521/ 897 (58.1%)          | 547/ 893 (61.3%)                   | 512/ 895 (57.2%)                   | 586/ 894 (65.5%)         | 0.0121            |
| Female                         | 376/ 897 (41.9%)          | 346/ 893 (38.7%)                   | 383/ 895 (42.8%)                   | 308/ 894 (34.5%)         |                   |
| Current smokers                |                           |                                    |                                    |                          |                   |
| No                             | 763/ 897 (85.1%)          | 761/ 893 (85.2%)                   | 764/ 895 (85.4%)                   | 760/ 894 (85.0%)         | 0.99              |
| Yes                            | 134/ 897 (14.9%)          | 132/ 893 (14.8%)                   | 131/ 895 (14.6%)                   | 134/ 894 (15.0%)         |                   |
| History of macrovascular event |                           |                                    |                                    |                          |                   |
| No                             | 616/ 897 (68.7%)          | 574/ 893 (64.3%)                   | 582/ 895 (65.0%)                   | 557/ 894 (62.3%)         | 0.0100            |
| Yes                            | 281/ 897 (31.3%)          | 319/ 893 (35.7%)                   | 313/ 895 (35.0%)                   | 337/ 894 (37.7%)         |                   |
| Age (years)                    |                           |                                    |                                    |                          |                   |
| N                              | 897                       | 893                                | 895                                | 894                      | 0.0042            |
| Mean (SD)                      | 67.3 (6.7)                | 67.1 (6.6)                         | 66.4 (6.5)                         | 66.6 (6.6)               |                   |
| Median (IRQ)                   | 67.0 (62.0, 72.0)         | 67.0 (62.0, 72.0)                  | 67.0 (61.0, 71.0)                  | 66.0 (61.0, 71.0)        |                   |
| Duration of diabetes (years)   |                           |                                    |                                    |                          |                   |
| N                              | 897                       | 892                                | 895                                | 894                      | <0.001            |
| Mean (SD)                      | 9.4 (6.9)                 | 8.2 (6.6)                          | 7.1 (6.0)                          | 6.9 (5.9)                |                   |
| Median (IRQ)                   | 9.0 (4.0, 14.0)           | 7.0 (3.0, 12.0)                    | 5.0 (2.0, 10.0)                    | 5.0 (2.0, 10.0)          |                   |
| BMI (Kg/m <sup>2</sup> )       |                           |                                    |                                    |                          |                   |
| N                              | 897                       | 891                                | 895                                | 894                      | <0.001            |
| Mean (SD)                      | 29.0 (5.3)                | 29.7 (5.1)                         | 30.5 (5.3)                         | 30.8 (5.2)               |                   |

| Characteristics                                | Tyrosine (mmol/L)         |                                    |                                    |                          | p-value for trend |
|------------------------------------------------|---------------------------|------------------------------------|------------------------------------|--------------------------|-------------------|
|                                                | 1st(<=0.045)<br>(N = 897) | 2nd(0.045 to <=0.052)<br>(N = 893) | 3rd(0.052 to <=0.059)<br>(N = 895) | 4th(>0.059)<br>(N = 894) |                   |
| Median (IRQ)                                   | 28.4 (25.3, 31.8)         | 29.0 (26.3, 32.3)                  | 29.7 (27.0, 33.2)                  | 30.1 (27.2, 33.7)        |                   |
| History of heart failure                       |                           |                                    |                                    |                          |                   |
| No                                             | 866/ 897 (96.5%)          | 855/ 893 (95.7%)                   | 850/ 895 (95.0%)                   | 842/ 894 (94.2%)         | 0.0128            |
| Yes                                            | 31/ 897 (3.5%)            | 38/ 893 (4.3%)                     | 45/ 895 (5.0%)                     | 52/ 894 (5.8%)           |                   |
| Participation in moderate or vigorous activity |                           |                                    |                                    |                          |                   |
| No                                             | 441/ 897 (49.2%)          | 477/ 893 (53.4%)                   | 465/ 895 (52.0%)                   | 467/ 894 (52.2%)         | 0.2980            |
| Yes                                            | 456/ 897 (50.8%)          | 416/ 893 (46.6%)                   | 430/ 895 (48.0%)                   | 427/ 894 (47.8%)         |                   |
| SBP (mmHg)                                     |                           |                                    |                                    |                          |                   |
| N                                              | 897                       | 893                                | 894                                | 894                      | 0.0221            |
| Mean (SD)                                      | 148.2 (22.8)              | 147.8 (21.4)                       | 146.4 (21.0)                       | 146.2 (20.7)             |                   |
| Median (IRQ)                                   | 145.5 (132.0, 161.5)      | 146.0 (132.5, 160.0)               | 145.0 (132.0, 158.0)               | 145.0 (132.5, 157.5)     |                   |
| DBP (mmHg)                                     |                           |                                    |                                    |                          |                   |
| N                                              | 897                       | 893                                | 894                                | 894                      | 0.0160            |
| Mean (SD)                                      | 80.9 (11.0)               | 81.4 (10.6)                        | 82.2 (11.0)                        | 81.9 (10.8)              |                   |
| Median (IRQ)                                   | 80.0 (73.5, 88.0)         | 81.0 (74.0, 88.5)                  | 82.0 (75.0, 89.0)                  | 81.5 (74.5, 89.0)        |                   |
| Total chol (mmol/l)                            |                           |                                    |                                    |                          |                   |
| N                                              | 897                       | 892                                | 895                                | 893                      | 0.1502            |
| Mean (SD)                                      | 5.2 (1.1)                 | 5.1 (1.1)                          | 5.3 (1.3)                          | 5.0 (1.1)                |                   |
| Median (IRQ)                                   | 5.1 (4.3, 5.9)            | 5.0 (4.3, 5.9)                     | 5.1 (4.4, 5.9)                     | 4.9 (4.3, 5.7)           |                   |
| HDL Chol (mmol/l)                              |                           |                                    |                                    |                          |                   |
| N                                              | 897                       | 891                                | 894                                | 892                      |                   |

| Characteristics                               | Tyrosine (mmol/L)         |                                    |                                    |                          | p-value<br>for trend |
|-----------------------------------------------|---------------------------|------------------------------------|------------------------------------|--------------------------|----------------------|
|                                               | 1st(<=0.045)<br>(N = 897) | 2nd(0.045 to <=0.052)<br>(N = 893) | 3rd(0.052 to <=0.059)<br>(N = 895) | 4th(>0.059)<br>(N = 894) |                      |
| Mean (SD)                                     | 1.2 (0.3)                 | 1.2 (0.3)                          | 1.2 (0.3)                          | 1.2 (0.3)                | 0.0072               |
| Median (IRQ)                                  | 1.2 (1.0, 1.4)            | 1.2 (1.0, 1.4)                     | 1.2 (1.0, 1.4)                     | 1.2 (1.0, 1.4)           |                      |
| Triacylglycerol (mmol/l)                      |                           |                                    |                                    |                          |                      |
| N                                             | 896                       | 892                                | 894                                | 892                      | 0.0446               |
| Mean (SD)                                     | 1.9 (1.1)                 | 1.9 (1.2)                          | 2.0 (1.4)                          | 2.0 (1.2)                |                      |
| Median (IRQ)                                  | 1.6 (1.2, 2.3)            | 1.6 (1.2, 2.3)                     | 1.8 (1.3, 2.4)                     | 1.7 (1.3, 2.4)           |                      |
| HbA1c (%)                                     |                           |                                    |                                    |                          |                      |
| N                                             | 894                       | 891                                | 890                                | 888                      | <0.001               |
| Mean % (SD) [mmol/mol]                        | 7.6 (1.6) [60]            | 7.4 (1.4) [57]                     | 7.3 (1.4) [56]                     | 7.3 (1.3) [56]           |                      |
| Urinary albumin:creatinine ratio<br>(mg/mmol) |                           |                                    |                                    |                          |                      |
| N                                             | 844                       | 839                                | 841                                | 840                      | <0.001               |
| Median (IRQ)                                  | 2.4 (1.1, 7.1)            | 2 (0.9, 5.5)                       | 1.6 (0.8, 4.3)                     | 1.6 (0.8, 4.4)           |                      |
| Glucose (mmol/l)                              |                           |                                    |                                    |                          |                      |
| N                                             | 896                       | 893                                | 895                                | 893                      | 0.0152               |
| Mean (SD)                                     | 8.6 (2.9)                 | 8.5 (2.6)                          | 8.4 (2.8)                          | 8.3 (2.4)                |                      |
| Median (IRQ)                                  | 8.0 (6.6, 10.0)           | 8.0 (6.6, 9.7)                     | 7.8 (6.6, 9.7)                     | 7.9 (6.6, 9.6)           |                      |
| eGFR (mL/min/1.73 m <sup>2</sup> )            |                           |                                    |                                    |                          |                      |
| N                                             | 894                       | 889                                | 890                                | 889                      | 0.0011               |
| Mean (SD)                                     | 70.9 (17.7)               | 70.9 (17.1)                        | 72.4 (16.2)                        | 73.1 (15.6)              |                      |
| Median (IRQ)                                  | 71.9 (58.1, 85.1)         | 71.2 (59.1, 84.4)                  | 72.8 (61.6, 84.9)                  | 72.2 (62.3, 86.0)        |                      |



| Characteristics   | Tyrosine (mmol/L)         |                                    |                                    |                          | p-value<br>for trend |
|-------------------|---------------------------|------------------------------------|------------------------------------|--------------------------|----------------------|
|                   | 1st(<=0.045)<br>(N = 897) | 2nd(0.045 to <=0.052)<br>(N = 893) | 3rd(0.052 to <=0.059)<br>(N = 895) | 4th(>0.059)<br>(N = 894) |                      |
| CRP (nmol/l)      |                           |                                    |                                    |                          |                      |
| N                 | 881                       | 867                                | 868                                | 867                      |                      |
| Mean (SD)         | 35.2 (81.0)               | 32.4 (54.3)                        | 34.3 (56.2)                        | 37.1 (73.3)              | 0.5176               |
| Median (IRQ)      | 15.2 (7.6, 34.3)          | 16.2 (8.6, 37.1)                   | 19.0 (9.5, 41.9)                   | 19.0 (8.6, 41.9)         |                      |
| hs-cTnT (ng/l)    |                           |                                    |                                    |                          |                      |
| N                 | 880                       | 866                                | 868                                | 866                      |                      |
| Mean (SD)         | 9.4 (12.9)                | 8.9 (26.9)                         | 8.1 (13.1)                         | 9.2 (23.0)               | 0.6502               |
| Median (IRQ)      | 5.0 (1.5, 12.0)           | 5.0 (1.5, 11.0)                    | 5.0 (1.5, 10.0)                    | 5.0 (1.5, 11.0)          |                      |
| NT-proBNP (pg/mL) |                           |                                    |                                    |                          |                      |
| N                 | 880                       | 866                                | 868                                | 866                      |                      |
| Mean (SD)         | 318.3 (1443.2)            | 256.6 (562.7)                      | 217.2 (627.6)                      | 220.9 (474.8)            | 0.0119               |
| Median (IRQ)      | 103.0 (42.0, 246.0)       | 90.0 (36.0, 222.0)                 | 76.0 (28.0, 191.0)                 | 79.0 (31.0, 200.0)       |                      |

Values are n (%), mean (standard deviation), or median (interquartile range)

ESM Table 8 Baseline characteristics classified by quarters of the histidine distribution

| Characteristics                | Histidine (mmol/L)        |                                    |                                    |                          | p-value for trend |
|--------------------------------|---------------------------|------------------------------------|------------------------------------|--------------------------|-------------------|
|                                | 1st(<=0.044)<br>(N = 892) | 2nd(0.044 to <=0.050)<br>(N = 891) | 3rd(0.050 to <=0.056)<br>(N = 893) | 4th(>0.056)<br>(N = 890) |                   |
| Sex                            |                           |                                    |                                    |                          |                   |
| Male                           | 444/ 892 (49.8%)          | 534/ 891 (59.9%)                   | 565/ 893 (63.3%)                   | 617/ 890 (69.3%)         | <0.001            |
| Female                         | 448/ 892 (50.2%)          | 357/ 891 (40.1%)                   | 328/ 893 (36.7%)                   | 273/ 890 (30.7%)         |                   |
| Current smokers                |                           |                                    |                                    |                          |                   |
| No                             | 756/ 892 (84.8%)          | 753/ 891 (84.5%)                   | 764/ 893 (85.6%)                   | 765/ 890 (86.0%)         | 0.3826            |
| Yes                            | 136/ 892 (15.2%)          | 138/ 891 (15.5%)                   | 129/ 893 (14.4%)                   | 125/ 890 (14.0%)         |                   |
| History of macrovascular event |                           |                                    |                                    |                          |                   |
| No                             | 581/ 892 (65.1%)          | 599/ 891 (67.2%)                   | 585/ 893 (65.5%)                   | 556/ 890 (62.5%)         | 0.1747            |
| Yes                            | 311/ 892 (34.9%)          | 292/ 891 (32.8%)                   | 308/ 893 (34.5%)                   | 334/ 890 (37.5%)         |                   |
| Age (years)                    |                           |                                    |                                    |                          |                   |
| N                              | 892                       | 891                                | 893                                | 890                      | 0.0019            |
| Mean (SD)                      | 67.2 (6.6)                | 66.9 (6.6)                         | 67.0 (6.6)                         | 66.2 (6.5)               |                   |
| Median (IRQ)                   | 68.0 (62.0, 72.0)         | 67.0 (62.0, 72.0)                  | 67.0 (62.0, 71.0)                  | 66.0 (61.0, 71.0)        |                   |
| Duration of diabetes (years)   |                           |                                    |                                    |                          |                   |
| N                              | 892                       | 891                                | 892                                | 890                      | 0.1189            |
| Mean (SD)                      | 8.1 (6.6)                 | 7.9 (6.5)                          | 8.1 (6.6)                          | 7.6 (6.2)                |                   |
| Median (IRQ)                   | 7.0 (3.0, 11.0)           | 6.0 (3.0, 11.0)                    | 6.0 (3.0, 12.0)                    | 6.0 (3.0, 11.0)          |                   |
| BMI (Kg/m <sup>2</sup> )       |                           |                                    |                                    |                          |                   |
| N                              | 892                       | 889                                | 893                                | 890                      | 0.0066            |
| Mean (SD)                      | 30.2 (5.4)                | 30.3 (5.4)                         | 29.8 (4.9)                         | 29.7 (5.3)               |                   |

| Characteristics                                | Histidine (mmol/L)        |                                    |                                    |                          | p-value<br>for trend |
|------------------------------------------------|---------------------------|------------------------------------|------------------------------------|--------------------------|----------------------|
|                                                | 1st(<=0.044)<br>(N = 892) | 2nd(0.044 to <=0.050)<br>(N = 891) | 3rd(0.050 to <=0.056)<br>(N = 893) | 4th(>0.056)<br>(N = 890) |                      |
| Median (IRQ)                                   | 29.6 (26.6, 33.3)         | 29.7 (26.6, 33.2)                  | 29.1 (26.5, 32.4)                  | 29.0 (26.3, 32.1)        |                      |
| History of heart failure                       |                           |                                    |                                    |                          |                      |
| No                                             | 829/ 892 (92.9%)          | 854/ 891 (95.8%)                   | 857/ 893 (96.0%)                   | 860/ 890 (96.6%)         | <0.001               |
| Yes                                            | 63/ 892 (7.1%)            | 37/ 891 (4.2%)                     | 36/ 893 (4.0%)                     | 30/ 890 (3.4%)           |                      |
| Participation in moderate or vigorous activity |                           |                                    |                                    |                          |                      |
| No                                             | 514/ 892 (57.6%)          | 472/ 891 (53.0%)                   | 443/ 893 (49.6%)                   | 415/ 890 (46.6%)         | <0.001               |
| Yes                                            | 378/ 892 (42.4%)          | 419/ 891 (47.0%)                   | 450/ 893 (50.4%)                   | 475/ 890 (53.4%)         |                      |
| SBP (mmHg)                                     |                           |                                    |                                    |                          |                      |
| N                                              | 892                       | 890                                | 893                                | 890                      | 0.0645               |
| Mean (SD)                                      | 146.5 (21.7)              | 146.3 (20.9)                       | 147.6 (21.7)                       | 148.0 (21.3)             |                      |
| Median (IRQ)                                   | 144.5 (131.3, 159.5)      | 144.5 (132.0, 158.5)               | 146.0 (133.5, 159.0)               | 145.5 (132.5, 160.5)     |                      |
| DBP (mmHg)                                     |                           |                                    |                                    |                          |                      |
| N                                              | 892                       | 890                                | 893                                | 890                      | 0.0163               |
| Mean (SD)                                      | 80.9 (10.8)               | 81.4 (10.9)                        | 81.8 (10.9)                        | 82.1 (10.6)              |                      |
| Median (IRQ)                                   | 80.0 (73.5, 88.3)         | 81.0 (74.0, 89.0)                  | 81.5 (75.0, 88.5)                  | 82.0 (74.5, 89.0)        |                      |
| Total chol (mmol/l)                            |                           |                                    |                                    |                          |                      |
| N                                              | 891                       | 891                                | 893                                | 889                      | 0.4220               |
| Mean (SD)                                      | 5.2 (1.1)                 | 5.2 (1.1)                          | 5.1 (1.1)                          | 5.1 (1.3)                |                      |
| Median (IRQ)                                   | 5.1 (4.3, 5.9)            | 5.1 (4.3, 5.9)                     | 5.0 (4.3, 5.9)                     | 5.0 (4.3, 5.8)           |                      |
| HDL Chol (mmol/l)                              |                           |                                    |                                    |                          |                      |
| N                                              | 889                       | 891                                | 893                                | 888                      |                      |

| Characteristics                               | Histidine (mmol/L)        |                                    |                                    |                          | p-value<br>for trend |
|-----------------------------------------------|---------------------------|------------------------------------|------------------------------------|--------------------------|----------------------|
|                                               | 1st(<=0.044)<br>(N = 892) | 2nd(0.044 to <=0.050)<br>(N = 891) | 3rd(0.050 to <=0.056)<br>(N = 893) | 4th(>0.056)<br>(N = 890) |                      |
| Mean (SD)                                     | 1.2 (0.3)                 | 1.2 (0.3)                          | 1.2 (0.3)                          | 1.2 (0.3)                | 0.8696               |
| Median (IRQ)                                  | 1.2 (1.0, 1.4)            | 1.2 (1.0, 1.4)                     | 1.2 (1.0, 1.4)                     | 1.2 (1.0, 1.4)           |                      |
| Triacylglycerol (mmol/l)                      |                           |                                    |                                    |                          |                      |
| N                                             | 889                       | 890                                | 893                                | 889                      |                      |
| Mean (SD)                                     | 2.0 (1.1)                 | 2.0 (1.2)                          | 2.0 (1.3)                          | 1.9 (1.2)                | 0.8676               |
| Median (IRQ)                                  | 1.7 (1.2, 2.4)            | 1.7 (1.2, 2.4)                     | 1.7 (1.3, 2.3)                     | 1.6 (1.2, 2.3)           |                      |
| HbA1c (%)                                     |                           |                                    |                                    |                          |                      |
| N                                             | 888                       | 885                                | 889                                | 888                      |                      |
| Mean % (SD) [mmol/mol]                        | 7.7 (1.7) [61]            | 7.5 (1.4) [59]                     | 7.3 (1.3) [56]                     | 7.1 (1.3) [54]           | <0.001               |
| Urinary albumin:creatinine ratio<br>(mg/mmol) |                           |                                    |                                    |                          |                      |
| N                                             | 844                       | 831                                | 844                                | 833                      |                      |
| Median (IRQ)                                  | 2.2 (1.1, 7)              | 2 (0.8, 5.3)                       | 1.8 (0.8, 4.7)                     | 1.6 (0.7, 4.5)           | 0.0161               |
| Glucose (mmol/l)                              |                           |                                    |                                    |                          |                      |
| N                                             | 892                       | 891                                | 892                                | 889                      |                      |
| Mean (SD)                                     | 8.8 (3.0)                 | 8.6 (2.8)                          | 8.3 (2.6)                          | 8.1 (2.4)                | <0.001               |
| Median (IRQ)                                  | 8.2 (6.7, 10.3)           | 8.0 (6.7, 9.8)                     | 7.9 (6.5, 9.4)                     | 7.6 (6.5, 9.2)           |                      |
| eGFR (mL/min/1.73 m <sup>2</sup> )            |                           |                                    |                                    |                          |                      |
| N                                             | 890                       | 887                                | 888                                | 884                      |                      |
| Mean (SD)                                     | 70.6 (16.9)               | 71.7 (16.7)                        | 72.4 (16.0)                        | 72.5 (17.1)              | 0.0106               |
| Median (IRQ)                                  | 70.1 (57.6, 83.7)         | 71.8 (60.0, 84.8)                  | 72.9 (61.6, 85.3)                  | 73.3 (61.0, 85.7)        |                      |

| Characteristics   | Histidine (mmol/L)        |                                    |                                    |                          | p-value<br>for trend |
|-------------------|---------------------------|------------------------------------|------------------------------------|--------------------------|----------------------|
|                   | 1st(<=0.044)<br>(N = 892) | 2nd(0.044 to <=0.050)<br>(N = 891) | 3rd(0.050 to <=0.056)<br>(N = 893) | 4th(>0.056)<br>(N = 890) |                      |
| CRP (nmol/l)      |                           |                                    |                                    |                          |                      |
| N                 | 870                       | 872                                | 872                                | 866                      |                      |
| Mean (SD)         | 51.4 (98.1)               | 34.3 (51.4)                        | 30.5 (51.4)                        | 24.8 (53.3)              | <0.001               |
| Median (IRQ)      | 23.8 (10.5, 56.2)         | 19.0 (9.5, 40.0)                   | 16.2 (7.6, 34.3)                   | 12.4 (6.7, 27.6)         |                      |
| hs-cTnT (ng/l)    |                           |                                    |                                    |                          |                      |
| N                 | 870                       | 870                                | 872                                | 865                      |                      |
| Mean (SD)         | 9.6 (31.4)                | 8.8 (11.3)                         | 8.4 (12.6)                         | 8.8 (17.6)               | 0.3204               |
| Median (IRQ)      | 4.0 (1.5, 11.0)           | 5.0 (1.5, 11.0)                    | 5.0 (1.5, 11.0)                    | 6.0 (1.5, 11.0)          |                      |
| NT-proBNP (pg/mL) |                           |                                    |                                    |                          |                      |
| N                 | 870                       | 870                                | 872                                | 865                      |                      |
| Mean (SD)         | 312.6 (785.2)             | 281.4 (1302.1)                     | 203.6 (426.7)                      | 216.8 (739.2)            | 0.0058               |
| Median (IRQ)      | 100.0 (37.0, 268.0)       | 96.0 (40.0, 223.0)                 | 81.5 (30.5, 192.5)                 | 75.0 (31.0, 193.0)       |                      |

Values are n (%), mean (standard deviation), or median (interquartile range)

ESM Table 9 Baseline characteristics classified by quarters of the valine distribution

| Characteristics                | Valine (mmol/L)           |                                    |                                    |                          | p-value for trend |
|--------------------------------|---------------------------|------------------------------------|------------------------------------|--------------------------|-------------------|
|                                | 1st(<=0.150)<br>(N = 897) | 2nd(0.150 to <=0.173)<br>(N = 901) | 3rd(0.173 to <=0.196)<br>(N = 895) | 4th(>0.196)<br>(N = 894) |                   |
| Sex                            |                           |                                    |                                    |                          |                   |
| Male                           | 432/ 897 (48.2%)          | 514/ 901 (57.0%)                   | 593/ 895 (66.3%)                   | 631/ 894 (70.6%)         | <0.001            |
| Female                         | 465/ 897 (51.8%)          | 387/ 901 (43.0%)                   | 302/ 895 (33.7%)                   | 263/ 894 (29.4%)         |                   |
| Current smokers                |                           |                                    |                                    |                          |                   |
| No                             | 755/ 897 (84.2%)          | 780/ 901 (86.6%)                   | 761/ 895 (85.0%)                   | 758/ 894 (84.8%)         | 0.9536            |
| Yes                            | 142/ 897 (15.8%)          | 121/ 901 (13.4%)                   | 134/ 895 (15.0%)                   | 136/ 894 (15.2%)         |                   |
| History of macrovascular event |                           |                                    |                                    |                          |                   |
| No                             | 612/ 897 (68.2%)          | 582/ 901 (64.6%)                   | 590/ 895 (65.9%)                   | 551/ 894 (61.6%)         | 0.0096            |
| Yes                            | 285/ 897 (31.8%)          | 319/ 901 (35.4%)                   | 305/ 895 (34.1%)                   | 343/ 894 (38.4%)         |                   |
| Age (years)                    |                           |                                    |                                    |                          |                   |
| N                              | 897                       | 901                                | 895                                | 894                      | <0.001            |
| Mean (SD)                      | 67.9 (6.9)                | 67.1 (6.6)                         | 66.9 (6.3)                         | 65.4 (6.3)               |                   |
| Median (IRQ)                   | 69.0 (63.0, 73.0)         | 67.0 (62.0, 72.0)                  | 67.0 (62.0, 71.0)                  | 66.0 (60.0, 70.0)        |                   |
| Duration of diabetes (years)   |                           |                                    |                                    |                          |                   |
| N                              | 897                       | 901                                | 894                                | 894                      | 0.1826            |
| Mean (SD)                      | 8.1 (7.0)                 | 8.1 (6.7)                          | 7.5 (6.0)                          | 7.9 (6.1)                |                   |
| Median (IRQ)                   | 6.0 (3.0, 12.0)           | 7.0 (3.0, 11.0)                    | 6.0 (2.0, 11.0)                    | 6.0 (3.0, 12.0)          |                   |
| BMI (Kg/m <sup>2</sup> )       |                           |                                    |                                    |                          |                   |
| N                              | 897                       | 899                                | 895                                | 894                      | <0.001            |
| Mean (SD)                      | 29.0 (5.2)                | 29.9 (5.2)                         | 30.3 (5.4)                         | 30.8 (5.1)               |                   |
| Median (IRQ)                   | 28.4 (25.5, 31.6)         | 29.1 (26.6, 32.7)                  | 29.4 (26.7, 33.0)                  | 30.3 (27.3, 33.6)        |                   |

| Characteristics                                | Valine (mmol/L)                  |                                          |                                          |                               | p-value<br>for trend |
|------------------------------------------------|----------------------------------|------------------------------------------|------------------------------------------|-------------------------------|----------------------|
|                                                | 1st( $\leq 0.150$ )<br>(N = 897) | 2nd(0.150 to $\leq 0.173$ )<br>(N = 901) | 3rd(0.173 to $\leq 0.196$ )<br>(N = 895) | 4th( $> 0.196$ )<br>(N = 894) |                      |
| History of heart failure                       |                                  |                                          |                                          |                               |                      |
| No                                             | 851/ 897 (94.9%)                 | 852/ 901 (94.6%)                         | 861/ 895 (96.2%)                         | 857/ 894 (95.9%)              | 0.1424               |
| Yes                                            | 46/ 897 (5.1%)                   | 49/ 901 (5.4%)                           | 34/ 895 (3.8%)                           | 37/ 894 (4.1%)                |                      |
| Participation in moderate or vigorous activity |                                  |                                          |                                          |                               |                      |
| No                                             | 484/ 897 (54.0%)                 | 472/ 901 (52.4%)                         | 446/ 895 (49.8%)                         | 449/ 894 (50.2%)              | 0.0656               |
| Yes                                            | 413/ 897 (46.0%)                 | 429/ 901 (47.6%)                         | 449/ 895 (50.2%)                         | 445/ 894 (49.8%)              |                      |
| SBP (mmHg)                                     |                                  |                                          |                                          |                               |                      |
| N                                              | 897                              | 900                                      | 895                                      | 894                           | 0.9113               |
| Mean (SD)                                      | 147.1 (22.4)                     | 147.3 (21.7)                             | 147.6 (21.1)                             | 146.8 (20.8)                  |                      |
| Median (IRQ)                                   | 145.5 (131.5, 160.0)             | 145.0 (132.5, 159.0)                     | 145.0 (133.0, 160.0)                     | 145.0 (133.0, 159.0)          |                      |
| DBP (mmHg)                                     |                                  |                                          |                                          |                               |                      |
| N                                              | 897                              | 900                                      | 895                                      | 894                           | 0.0011               |
| Mean (SD)                                      | 80.9 (11.2)                      | 81.2 (10.8)                              | 82.1 (10.5)                              | 82.3 (10.9)                   |                      |
| Median (IRQ)                                   | 80.0 (72.5, 88.5)                | 80.3 (74.0, 87.8)                        | 81.5 (75.0, 88.5)                        | 82.0 (75.0, 89.5)             |                      |
| Total chol (mmol/l)                            |                                  |                                          |                                          |                               |                      |
| N                                              | 897                              | 901                                      | 895                                      | 892                           | <0.001               |
| Mean (SD)                                      | 5.3 (1.2)                        | 5.2 (1.1)                                | 5.0 (1.1)                                | 5.1 (1.3)                     |                      |
| Median (IRQ)                                   | 5.2 (4.5, 6.1)                   | 5.1 (4.4, 5.9)                           | 5.0 (4.3, 5.8)                           | 4.9 (4.3, 5.7)                |                      |
| HDL Chol (mmol/l)                              |                                  |                                          |                                          |                               |                      |
| N                                              | 896                              | 900                                      | 894                                      | 892                           | <0.001               |
| Mean (SD)                                      | 1.3 (0.4)                        | 1.2 (0.3)                                | 1.2 (0.3)                                | 1.2 (0.3)                     |                      |

| Characteristics                            | Valine (mmol/L)           |                                    |                                    |                          | p-value for trend |
|--------------------------------------------|---------------------------|------------------------------------|------------------------------------|--------------------------|-------------------|
|                                            | 1st(<=0.150)<br>(N = 897) | 2nd(0.150 to <=0.173)<br>(N = 901) | 3rd(0.173 to <=0.196)<br>(N = 895) | 4th(>0.196)<br>(N = 894) |                   |
| Median (IRQ)                               | 1.3 (1.1, 1.5)            | 1.2 (1.0, 1.4)                     | 1.2 (1.0, 1.4)                     | 1.1 (1.0, 1.3)           |                   |
| Triacylglycerol (mmol/l)                   |                           |                                    |                                    |                          |                   |
| N                                          | 896                       | 901                                | 895                                | 890                      |                   |
| Mean (SD)                                  | 1.8 (1.3)                 | 1.9 (1.0)                          | 2.0 (1.2)                          | 2.2 (1.3)                | <0.001            |
| Median (IRQ)                               | 1.5 (1.1, 2.1)            | 1.6 (1.2, 2.3)                     | 1.7 (1.2, 2.3)                     | 1.9 (1.4, 2.6)           |                   |
| HbA1c (%)                                  |                           |                                    |                                    |                          |                   |
| N                                          | 893                       | 898                                | 891                                | 889                      |                   |
| Mean % (SD) [mmol/mol]                     | 7.2 (1.5) [55]            | 7.3 (1.4) [56]                     | 7.4 (1.3) [57]                     | 7.7 (1.5) [61]           | <0.001            |
| Urinary albumin:creatinine ratio (mg/mmol) |                           |                                    |                                    |                          |                   |
| N                                          | 836                       | 844                                | 854                                | 838                      |                   |
| Median (IRQ)                               | 1.9 (0.8, 5.3)            | 2.1 (0.9, 5.9)                     | 1.8 (0.8, 4.5)                     | 1.9 (0.8, 5.9)           | 0.0028            |
| Glucose (mmol/l)                           |                           |                                    |                                    |                          |                   |
| N                                          | 897                       | 901                                | 894                                | 893                      |                   |
| Mean (SD)                                  | 8.0 (2.8)                 | 8.2 (2.5)                          | 8.5 (2.5)                          | 9.2 (2.9)                | <0.001            |
| Median (IRQ)                               | 7.4 (6.2, 9.1)            | 7.7 (6.5, 9.3)                     | 8.0 (6.8, 9.6)                     | 8.6 (7.1, 10.6)          |                   |
| eGFR (mL/min/1.73 m <sup>2</sup> )         |                           |                                    |                                    |                          |                   |
| N                                          | 894                       | 895                                | 895                                | 886                      |                   |
| Mean (SD)                                  | 68.8 (17.8)               | 71.7 (16.7)                        | 72.4 (16.0)                        | 74.3 (15.8)              | <0.001            |
| Median (IRQ)                               | 69.0 (56.7, 82.7)         | 71.7 (60.4, 84.4)                  | 72.5 (61.4, 85.0)                  | 74.3 (63.2, 87.3)        |                   |
| CRP (nmol/l)                               |                           |                                    |                                    |                          |                   |



| Characteristics   | Valine (mmol\L)           |                                    |                                    |                          | p-value<br>for trend |
|-------------------|---------------------------|------------------------------------|------------------------------------|--------------------------|----------------------|
|                   | 1st(<=0.150)<br>(N = 897) | 2nd(0.150 to <=0.173)<br>(N = 901) | 3rd(0.173 to <=0.196)<br>(N = 895) | 4th(>0.196)<br>(N = 894) |                      |
| N                 | 877                       | 872                                | 878                                | 864                      |                      |
| Mean (SD)         | 40.0 (88.6)               | 35.2 (61.0)                        | 29.5 (48.6)                        | 35.2 (64.8)              | 0.0619               |
| Median (IRQ)      | 17.1 (7.6, 41.0)          | 18.1 (9.4, 40.0)                   | 17.1 (8.6, 35.2)                   | 18.1 (8.6, 41.0)         |                      |
| hs-cTnT (ng/l)    |                           |                                    |                                    |                          |                      |
| N                 | 877                       | 871                                | 876                                | 864                      |                      |
| Mean (SD)         | 9.7 (13.4)                | 9.7 (28.3)                         | 7.5 (9.3)                          | 8.7 (22.8)               | 0.0902               |
| Median (IRQ)      | 5.0 (1.5, 12.0)           | 5.0 (1.5, 11.0)                    | 5.0 (1.5, 10.0)                    | 5.0 (1.5, 10.0)          |                      |
| NT-proBNP (pg/mL) |                           |                                    |                                    |                          |                      |
| N                 | 877                       | 871                                | 876                                | 864                      |                      |
| Mean (SD)         | 377.0 (1443.8)            | 274.2 (835.6)                      | 190.1 (328.3)                      | 171.6 (334.4)            | <0.001               |
| Median (IRQ)      | 115.0 (49.0, 279.0)       | 97.0 (37.0, 221.0)                 | 75.0 (28.0, 203.0)                 | 66.0 (27.0, 167.0)       |                      |

Values are n (%), mean (standard deviation), or median (interquartile range)

ESM Table 10 Associations of the amino acids with risk of all 3 endpoints (per 1 standard deviation increase)

|                            | Macrovascular events |           |         | Microvascular events |           |         | All Deaths |           |         |
|----------------------------|----------------------|-----------|---------|----------------------|-----------|---------|------------|-----------|---------|
|                            | HR                   | 95% CI    | p-value | HR                   | 95% CI    | p-value | HR         | 95% CI    | p-value |
| <b>Model 1</b>             |                      |           |         |                      |           |         |            |           |         |
| Phenylalanine (1SD=0.0088) | 1.22                 | 1.12,1.32 | <0.001  | 1.09                 | 0.98,1.22 | 0.110   | 1.21       | 1.12,1.32 | <0.001  |
| Isoleucine (1SD=0.0170)    | 1.06                 | 0.98,1.15 | 0.152   | 1.09                 | 0.99,1.2  | 0.064   | 1.00       | 0.91,1.1  | 0.950   |
| Glutamine (1SD=0.1096)     | 0.88                 | 0.79,0.98 | 0.020   | 0.87                 | 0.76,1.01 | 0.062   | 0.85       | 0.76,0.94 | 0.002   |
| Leucine (1SD=0.0197)       | 0.96                 | 0.87,1.05 | 0.325   | 1.04                 | 0.93,1.16 | 0.508   | 0.89       | 0.8,0.99  | 0.031   |
| Alanine (1SD=0.0645)       | 0.96                 | 0.88,1.05 | 0.385   | 0.95                 | 0.85,1.07 | 0.425   | 0.91       | 0.83,1    | 0.040   |
| Tyrosine (1SD=0.0112)      | 1.01                 | 0.92,1.1  | 0.874   | 0.74                 | 0.64,0.86 | <0.001  | 0.96       | 0.87,1.06 | 0.418   |
| Histidine (1SD=0.0095)     | 0.86                 | 0.79,0.94 | 0.001   | 0.93                 | 0.83,1.05 | 0.237   | 0.83       | 0.76,0.91 | <0.001  |
| Valine (1SD=0.0352)        | 0.94                 | 0.86,1.03 | 0.167   | 1.00                 | 0.89,1.13 | 0.970   | 0.81       | 0.73,0.89 | <0.001  |
| <b>Model 2</b>             |                      |           |         |                      |           |         |            |           |         |
| Phenylalanine (1SD=0.0088) | 1.09                 | 0.98,1.21 | 0.105   | 1.02                 | 0.89,1.17 | 0.767   | 1.04       | 0.94,1.16 | 0.440   |
| Isoleucine (1SD=0.0170)    | 1.01                 | 0.90,1.13 | 0.905   | 0.93                 | 0.80,1.08 | 0.321   | 0.90       | 0.79,1.02 | 0.112   |
| Glutamine (1SD=0.1096)     | 0.93                 | 0.83,1.05 | 0.261   | 0.91                 | 0.78,1.06 | 0.229   | 0.93       | 0.83,1.05 | 0.262   |
| Leucine (1SD=0.0197)       | 0.91                 | 0.81,1.02 | 0.101   | 0.89                 | 0.77,1.04 | 0.140   | 0.79       | 0.69,0.90 | 0.001   |
| Alanine (1SD=0.0645)       | 0.98                 | 0.89,1.08 | 0.704   | 0.86                 | 0.76,0.98 | 0.022   | 0.91       | 0.83,1.01 | 0.075   |
| Tyrosine (1SD=0.0112)      | 1.01                 | 0.91,1.12 | 0.868   | 0.78                 | 0.67,0.91 | 0.002   | 0.96       | 0.86,1.07 | 0.456   |
| Histidine (1SD=0.0095)     | 0.92                 | 0.84,1.01 | 0.089   | 0.92                 | 0.82,1.03 | 0.147   | 0.89       | 0.81,0.99 | 0.024   |
| Valine (1SD=0.0352)        | 0.94                 | 0.84,1.04 | 0.247   | 0.91                 | 0.80,1.04 | 0.150   | 0.79       | 0.70,0.88 | <0.001  |

Model 1 adjusted for Age, sex, regions and randomised treatment

Model 2 additionally adjusted for previous macrovascular event, duration of diabetes, current smoking, systolic blood pressure, BMI (Kg/m<sup>2</sup>), albumin/creatinine ratio, estimated glomerular filtration rate, HbA1c, plasma Glucose (mmol/l), total and HDL Chol (mmol/l) cholesterol, Triacylglycerol (mmol/l), aspirin or other antiplatelet agent, statin or other lipid-lowering agent,  $\beta$ -

blocker, ACE inhibitor or angiotensin receptor blocker, metformin use, history of heart failure, participation in moderate and/or vigorous exercise for >15 min at least once weekly, and C-reactive protein.

ESM Table 11: Sensitivity analysis - Associations of the amino acids with risk of all 3 endpoints (per 1 standard deviation increase) in those with no missing values in model 2 of table s10

|                                | Macrovascular events |           |         | Microvascular events |           |         | All Deaths |           |         |
|--------------------------------|----------------------|-----------|---------|----------------------|-----------|---------|------------|-----------|---------|
|                                | HR                   | 95% CI    | p-value | HR                   | 95% CI    | p-value | HR         | 95% CI    | p-value |
| <b>Model 1 * (sensitivity)</b> |                      |           |         |                      |           |         |            |           |         |
| Phenylalanine (1SD=0.0088)     | 1.19                 | 1.09,1.30 | <0.001  | 1.05                 | 0.98,1.22 | 0.381   | 1.17       | 1.07,1.28 | <0.001  |
| Isoleucine (1SD=0.0170)        | 1.05                 | 0.96,1.14 | 0.300   | 1.05                 | 0.99,1.2  | 0.312   | 0.98       | 0.88,1.08 | 0.635   |
| Glutamine (1SD=0.1096)         | 0.87                 | 0.78,0.98 | 0.017   | 0.84                 | 0.76,1.01 | 0.017   | 0.86       | 0.77,0.96 | 0.009   |
| Leucine (1SD=0.0197)           | 0.95                 | 0.86,1.05 | 0.321   | 1.01                 | 0.93,1.16 | 0.868   | 0.87       | 0.78,0.98 | 0.017   |
| Alanine (1SD=0.0645)           | 0.97                 | 0.89,1.06 | 0.499   | 0.90                 | 0.85,1.07 | 0.091   | 0.90       | 0.82,0.99 | 0.033   |
| Tyrosine (1SD=0.0112)          | 0.99                 | 0.89,1.09 | 0.766   | 0.70                 | 0.64,0.86 | <0.001  | 0.95       | 0.86,1.06 | 0.364   |
| Histidine (1SD=0.0095)         | 0.86                 | 0.79,0.95 | 0.002   | 0.89                 | 0.83,1.05 | 0.044   | 0.83       | 0.76,0.92 | <0.001  |
| Valine (1SD=0.0352)            | 0.95                 | 0.86,1.04 | 0.282   | 0.97                 | 0.89,1.13 | 0.609   | 0.81       | 0.73,0.90 | <0.001  |

Model 1 adjusted for Age, sex, regions and randomised treatment

## References

1. Soininen P, Kangas AJ, Würtz P, Suna T, Ala-Korpela M. Quantitative serum nuclear magnetic resonance metabolomics in cardiovascular epidemiology and genetics. *Circ Cardiovasc Genet*. 2015;8:192–206.
2. Tillin T, Hughes AD, Wang Q, Würtz P, Ala-Korpela M, Sattar N, et al. Diabetes risk and amino acid profiles: cross-sectional and prospective analyses of ethnicity, amino acids and diabetes in a South Asian and European cohort from the SABRE (Southall And Brent REvisited) Study. *Diabetologia*. 2015;58:968–79.
3. Würtz P, Havulinna AS, Soininen P, Tynkkynen T, Prieto-Merino D, Tillin T, et al. Metabolite profiling and cardiovascular event risk: a prospective study of 3 population-based cohorts. *Circulation*. 2015;131:774–85.
4. Kaikkonen JE, Würtz P, Suomela E, Lehtovirta M, Kangas AJ, Jula A, et al. Metabolic profiling of fatty liver in young and middle-aged adults: Cross-sectional and prospective analyses of the Young Finns Study. *Hepatology*. 2017;65:491–500.
5. Preiss D, Rankin N, Welsh P, Holman RR, Kangas AJ, Soininen P, et al. Effect of metformin therapy on circulating amino acids in a randomized trial: the CAMERA study. *Diabet Med*. 2016;33:1569–1574
